# Supplementary material for: The layered costs and benefits of translational redundancy
Source: eLife. 2023 Mar 2;12:e81005. doi: 10.7554/eLife.81005 (PMC9981150; doi:10.7554/eLife.81005)
Supplement: Figure 2—source data 1. [file elife-81005-fig2-data1.xlsx]

## Sheet: Fig 2
Relative growth rate of 3-4 biological replicates per strain per medium, calculated with respect to WT, (growth rate of mutant / growth rate of WT); blank cells are cases with a machine error; X indicates replicates which failed to show exponential growth
Medium	Fig 2A	Rel R of mutants
	ΔproL (GGG)				ΔleuV (CAG)				ΔasnT (GUU)				ΔasnU (GUU)				ΔasnV (GUU)				ΔasnW (GUU)				ΔglnX (CUG)				ΔargQ (ACG)				ΔtyrV (GUA)				ΔserX (GGA)				ΔserW (GGA)				ΔaspV (GUC)				ΔthrT (GGU)
TB	0.916909	0.959071	0.9563	1.02803	1.09465	1.0468		1.14605	1.13108	0.98368	1.09974	1.0421	0.904508	0.912997	0.933119	0.882396		1.06914	1.02934	1.02778	1.08328	1.0632	1.0829	1.09984		1.04575	1.03805	1.05516	0.853748	0.825394	0.893287	0.979377	0.888437	0.899449	0.919783	0.992443	1.05719	1.10251	1.10901	1.11484	1.04585	1.0426	1.0518	1.01231	1.00834	0.967515	1.00911	0.991554	1.08562
LB	0.984407	0.926164	0.931115	0.98559	0.960339	0.925133	0.911166	0.945142	1.17901	1.10228	1.06832	1.02295	0.994417	0.989904	0.993394	0.956066	0.963769	0.987182	0.975929	0.981629	0.978324	1.02541	1.01737	1.1312	1.13006	1.11683	1.11375	1.16286	0.907874	1.00943	1.07346	1.07316	0.824198	0.822902	0.847769	0.83189	1.00926	0.998738	1.01767	0.986667	0.980239	0.960801	0.965175	0.954249	1.06823	1.0493	1.05593	1.0693	1.07411
	Fig 2B	Rel R of mutants
	ΔproL (GGG)				ΔleuV (CAG)				ΔasnT (GUU)				ΔasnU (GUU)				ΔasnV (GUU)				ΔasnW (GUU)				ΔglnX (CUG)				ΔargQ (ACG)				ΔtyrV (GUA)				ΔserX (GGA)				ΔserW (GGA)				ΔaspV (GUC)				ΔthrT (GGU)
GA 1.6	1.02709	1.05615	1.03456	0.986025	0.902641	0.870298	0.965471	1.01904	0.744855	0.749394	0.760568	0.77506	0.747515	0.736075	0.740845	0.723984	0.811556	0.79886	0.838108	0.815883	0.79446	0.805138	0.80604	0.81374	0.836562	0.875957	0.849216	0.811641	0.870854	0.786481	0.815457	0.835118	0.945824	0.932738	0.90623	0.960714	0.855946	0.878192	0.84776	0.837153	0.846166	0.851544	0.854456	0.851186	1.00895	0.973535	1.00985	0.993098	0.87856
GA 0.8	0.900283	0.912886	0.938124	0.9779	1.01024	0.962339	0.94271	0.976001	0.969901	0.95857	0.925518	0.914586	0.845365	0.835825	0.852694	0.878766	0.960479	0.957553	0.972315	0.954141	0.87792	0.896781	0.904772	0.91838	0.982612	0.973055	0.979896	1.01045	1.03592	1.02419	1.0567	1.05639	0.824405	0.810815	0.898912	0.933632	1.01478	0.973711	1.07271	1.0455	1.07192	1.06829	1.09467	1.09064	1.10031	1.11849	1.0921	1.0833	1.06895
	Fig 2C	Rel R of mutants
	ΔproL (GGG)				ΔleuV (CAG)				ΔasnT (GUU)				ΔasnU (GUU)				ΔasnV (GUU)				ΔasnW (GUU)				ΔglnX (CUG)				ΔargQ (ACG)				ΔtyrV (GUA)				ΔserX (GGA)				ΔserW (GGA)				ΔaspV (GUC)				ΔthrT (GGU)
Lactose	0.92625	0.832844	1.00326	0.95047	0.972575	0.957508	0.914841	0.957376	0.958205	0.932066	0.910377	0.872278	0.829711	0.800473	0.847749	0.828897	1.04272	0.978412	0.972255	0.963214	0.731969	0.681701	0.722726	0.739184	1.02223	1.05422	1.07128	1.05145	0.918407	0.942113	0.985004	0.958182	1.10349	1.12178	1.00212	1.03502	1.03984	0.938829	0.961773	0.986238	0.925141	0.944962	0.950538	0.952109	0.941355	0.976502	0.960196	0.993562	0.994346
Succinate	1.27339	1.25394	1.21037	1.16508	1.01047	1.00936	0.943292	0.958091	1.16034	0.936486	0.967206	0.997216	1.25914	1.3333	1.32746	1.26693	1.1383	1.12056	1.095	1.16485	0.833465	0.918766	0.930345	0.95579	X	X	X	X	0.957572	0.959783	1.01371	0.956967	0.870126	0.837208	0.834052	0.833309	1.01779	0.999774	0.988854	0.923293	0.867548	0.853447	0.885974	0.914706	1.01629	0.991763	0.983114	0.966247	1.20706
Glycerol	0.853874	0.803108	0.87761	0.902026	0.957634	0.879379	0.85557	0.925282	1.19163	1.18356	1.16226	1.20938	1.14739	1.1376	1.13006	1.13841	1.1403	1.1041	1.11911	1.12424	1.11404	1.11225	1.11281	1.12746	1.04559	1.06962	1.07769	1.09349	1.05282	1.10895	1.1372	1.13712	0.915778	0.9052	0.919726		1.065	1.0669	1.04438	1.0038	0.99874	1.00057	0.975283	1.01305	1.097	1.25628	1.24723	1.06079	1.04164
Galactose	1.30569	1.22172	1.23583	1.19335	0.992294	0.94892	0.896922	0.780131	1.23001	1.11339	1.16906	1.07195	1.23161	1.41797	1.36969	1.29492	1.40032	1.25045	1.28671	1.22858	1.06258	1.05408	1.0554	1.01213	0.810847	0.795073	0.779658	0.739323	1.25277	1.09977	1.03829	1.04538	1.20952	1.12904	1.0812	1.10445	1.1624	1.17535	1.12388	1.10621	1.07215	0.992233	0.965673	0.93468	1.0222			1.08318	1.53822
	Fig 2D	Mean Rel R of mutants
	WT abs R	ΔproL (GGG)	ΔleuV (CAG)	ΔasnT (GUU)	ΔasnU (GUU)	ΔasnV (GUU)	ΔasnW (GUU)	ΔglnX (CUG)	ΔargQ (ACG)	ΔtyrV (GUA)	ΔserX (GGA)	ΔserW (GGA)	ΔaspV (GUC)	ΔthrT (GGU)	ΔpheV (GAA)	ΔpheU (GAA)	ΔproK (GGG)	ΔserU (CGA)	ΔglyU (CCC)	ΔthrW (CGU)	ΔleuX (CAA)	ΔvalUXY (UAC)	ΔleuVPQ (CAG)	ΔglyVXY (GCC)	ΔrrnE 1	ΔrrnGE 2	Δrrn GAB 3	Δrrn 4	Δrrn 4'
GCA 1.6	1.31	1.02596	0.939363	0.757469	0.737105	0.816102	0.804845	0.843344	0.826978	0.936377	0.850838	0.84486	0.996357	0.893275	0.858595	0.795036	0.901518	0.854763	0.887752	0.95358	0.853463	0.939593	0.70796	0.591526
TB	1.29	0.965077	1.09583	1.06415	0.908255	1.04209	1.08231	1.04632	0.887952	0.925028	1.03814	0.972427	0.994131	1.10404	1.02539	0.944997	1.00845	1.09589	1.07161	0.999554	1.10765	0.853169	0.801243	0.778121	1.00562	0.981848	0.963659	0.80466	0.765178
RLB	1.29	0.956819	0.935445	1.09314	0.983445	0.977127	1.03808	1.13088	1.01598	0.83169	0.965116	1.10179	1.06069	1.04644	0.947758	0.915643	1.04757	1.00308	1.09727	0.998223	1.01551	0.828384	0.721677	0.806678	0.960739	0.994317	0.971584	0.79843	0.722924
GCA 0.8	0.98	0.932298	0.972822	0.942144	0.853163	0.961122	0.899463	0.986503	1.0433	0.866941	1.08138	1.07519	1.09855	1.0668	0.923662	1.06294	1.08017	1.02667	1.0898	0.935024	1.12605	1.01079	0.949256	0.860083
Lac	0.76	0.928206	0.950575	0.918232	0.826708	0.989151	0.718895	1.0498	0.950927	1.0656	0.943188	0.950583	0.967904	0.968422	0.783607	1.07668	0.956674	0.981671	0.972345	1.04676	0.987514	1.04663	0.957934	0.918637	1.04203	1.05742	1.03737	0.990169	1.21748
Succ	0.32	1.22569	0.980303	1.01531	1.2967	1.12968	0.909592		0.972007	0.843674	0.880419	1.04613	0.989353	1.20214	1.11196	1.32816	1.00758	0.982429	1.091	0.929434	0.754362		1.04153	1.21021	0.801455	1.49545	1.62784	1.52256	1.15119
Glyc	0.3	0.859155	0.904466	1.18671	1.13837	1.12194	1.11664	1.0716	1.10902	0.913568	0.996911	1.10746	1.16532	1.03672	0.844555	1.11942	1.10181	1.04502	1.14238	1.06568	1.2156	1.05483	1.22691	1.25822	0.916177	1.19588	1.34465	1.47917	1.51475
Gal	0.18	1.23915	0.904567	1.1461	1.32855	1.29151	1.04605	0.781225	1.10905	1.13105	0.991184	1.03527	1.05269	1.37864	1.93288	1.26743	0.927387	1.14196	1.39996	1.03877	0.838018	0.920561	1.22283	1.74527	1.10837	1.83165	2.14635	2.3186	2.40294
[truncated: 43 more columns]
