# Supplementary material for: The layered costs and benefits of translational redundancy
Source: eLife. 2023 Mar 2;12:e81005. doi: 10.7554/eLife.81005 (PMC9981150; doi:10.7554/eLife.81005)
Supplement: Figure 3—source data 1. [file elife-81005-fig3-data1.xlsx]

## Sheet: Sheet1
Rel R of mutants, calculated as described for Fig 2, in the second medium noted in each column (e.g. in TB to Gly, growth rate given is measured in Gly); X indicates replicates that did not grow in all nutrient shifts of the experiment
	Experiment 1		Experiment 2
	Downshift	Upshift	Downshift	Upshift
Mutant	TB to Gly	Gly to TB	TB to Gal	Gal to TB
ΔasnT (GTT)	1.18944	1.08392	1.10554	1.16878
ΔasnU (GTT)	1.00184	1.01078	1.09744	1.16078
ΔasnV (GTT)	1.14429	1.01783	0.976004	1.23231
ΔasnW (GTT)	1.12014	1.09242	1.04613	1.10636
ΔargQ (ACG)	1.10649	1.09625	0.885981	1.32134
ΔaspV (GTC)	0.983635	1.05127	1.04826	1.24675
ΔglyVXY (GCC)	1.35044	0.67286	0.699684	2.3267
ΔglyU (CCC)	1.1422	1.04093	1.10134	1.1753
ΔglnX (CUG)	1.12218	1.06811	1.04692	0.909933
ΔleuX (CAA)	1.13215	1.01807	0.984948	1.46169
ΔleuVPQ (CAG)	1.16357	0.768405	0.815138	1.30234
ΔleuV (CAG)	0.924033	1.0151	0.997218	1.08267
ΔproL (GGG)	1.00252	0.909294	0.900061	1.30904
ΔproK (GGG)	1.02977	0.942285	1.08764	1.41971
ΔpheV (GAA)	1.13366	X	X	1.48863
ΔpheU (GAA)	1.17408	0.772164	0.813277	1.38607
ΔserU (CGA)	1.07597	0.932864	1.08708	1.20383
ΔserX (GGA)	0.951091	0.980639	1.00231	1.0268
ΔserW (GGA)	0.982755	0.993898	1.09675	1.04568
ΔthrT (GGT)	X	1.11134	1.04982	1.1181
ΔthrW (CGT)	0.023102	0.929116	0.960471	0.930349
ΔtyrV (GTA)	0.963008	0.869734	0.771839	1.10422
ΔvalUXY (TAC)	0.787135	0.880152	0.867116	0.787135
Δrrn 1	0.991725	0.98048	1.17599	0.991725
Δrrn 2	1.03799	1.1981	0.727803	1.03799
Δrrn 3	1.02794	1.1434	0.787967	1.02794
Δrrn 4	1.61936	0.769639	0.767349	1.61936
Δrrn 4'	1.28726	1.01211	1.0115	1.28726
