# Supplementary material for: The layered costs and benefits of translational redundancy
Source: eLife. 2023 Mar 2;12:e81005. doi: 10.7554/eLife.81005 (PMC9981150; doi:10.7554/eLife.81005)
Supplement: Figure 4—source data 1. [file elife-81005-fig4-data1.xlsx]

## Sheet: Sheet1
	Fig 4A				Fig 4B
					Medium	Strain	tRNA isotype expression in mutant relative to WT
tRNA isotype	Expression in poor medium relative to rich medium				Rich (LB)		Gly-GCC	Leu-CAG	Gly-CCC	Thr-CGU
Leu-UAA	-2.81941					ΔglyVXY (GCC)	1.31951	0.141978	-0.28198	0.252847
Phe-GAA	-1.7049					ΔleuVPQ (CAG)	0.280261	1.30976	0.164127	-0.18867
Ser-CGA	-1.66836					ΔglyU (CCC)	0.03475	0.224011	11.0517	0.073981
Trp-CCA	-1.63915					ΔthrW (CGU)	0.073172	0.067386	0.032592	11.1719
Leu-CAA	-1.18406
Cys-GCA	-1.03219				Poor (M9 Gal)
Ser-UGA	-0.65383						Gly-GCC	Leu-CAG	Gly-CCC	Thr-CGU
Val-UAC	-0.50909					ΔglyVXY (GCC)	1.70594	-0.04215	-0.27601	-0.06806
Ser-GCU	-0.50398					ΔleuVPQ (CAG)	-0.02321	1.35407	-0.22832	0.088256
Arg-UCU	-0.4098					ΔglyU (CCC)	0.288805	0.065515	11.9	-0.20519
Tyr-GUA	-0.36714					ΔthrW (CGU)	0.225676	0.148077	0.074599	10.7692
Glu-UUC	-0.34682
Arg-ACG	-0.22614
Asn-GUU	-0.17011
Sec-UCA	-0.16117
Ile-GAU	-0.15607
Lys-UUU	-0.13934
Asp-GUC	-0.10854
Val-GAC	-0.01733
Pro-UGG	0.013157
Gly-GCC	0.020942
Gly-CCC	0.032304
Ala-UGC	0.056583
Thr-UGU	0.059515
Ser-GGA	0.102878
Thr-GGU	0.105618
Gly-UCC	0.105764
Pro-GGG	0.202667
Arg-CCG	0.228312
Pro-CGG	0.248503
Leu-CAG	0.253535
Ala-GGC	0.336448
Gln-UUG	0.404768
His-GUG	0.484414
Leu-GAG	0.549412
Met-CAU	0.599993
Gln-CUG	0.633505
Leu-UAG	0.732324
Thr-CGU	0.746439
fMet-CAU	1.06228
Arg-CCU	1.08799
Ile2-CAU	3.57332
