# Supplementary material for: The layered costs and benefits of translational redundancy
Source: eLife. 2023 Mar 2;12:e81005. doi: 10.7554/eLife.81005 (PMC9981150; doi:10.7554/eLife.81005)
Supplement: Figure 5—source data 1. [file elife-81005-fig5-data1.xlsx]

## Sheet: Sheet1
Relative elongation rate of mutants in each medium, compared to WT (mutant/WT). 2-3 replicates per strain per medium.
Medium	ΔasnT (GUU)		ΔserX (GGA)		ΔglyU (CCC)		ΔleuX (CAA)		ΔleuVPQ (CAG)			ΔglyVXY (GCC)
LB	0.923077	0.923077	0.923077	0.923077	0.830769	0.830769	0.923077	0.923077	0.53598	0.53598	0.53598	0.830769	0.830769	0.755245
GA 0.8	0.980037	0.846395	1.03448	0.931035	1.16379	1.03448	1.03448	1.03448	0.665025	0.665025	0.665025	0.600667	0.600667
Glycerol	1.27273	1.12	1	1	1.12	1.12	1.47368	1.47368	1.27273	1.27273		1.47368	1.27273
