# Supplementary material for: The layered costs and benefits of translational redundancy
Source: eLife. 2023 Mar 2;12:e81005. doi: 10.7554/eLife.81005 (PMC9981150; doi:10.7554/eLife.81005)
Supplement: Figure 6—source data 1. [file elife-81005-fig6-data1.xlsx]

## Sheet: Sheet1
Rel R of mutants, calculated as described for Fig 2
Medium	Fig 6A
	Rel R of mutants
	ΔcmoA				ΔcmoB				ΔproK (CGG)				ΔproK cmoB				ΔthrW (CGT)				ΔthrW cmoB				ΔserU (CGA)				ΔserU cmoB				ΔleuVPQ (CAG)				ΔleuVPQ cmoB				ΔmnmG				ΔglyU (CCC)				ΔglyU mnmG
TB	0.972907	0.841428	0.892633	0.855168	0.812477	0.787165	0.873204	0.907168	1.00135	0.933202	1.03027	0.965269	0.977708	0.987104	1.03501	0.999045	1.00613	1.07069	1.03786	1.05563	0.687105	0.622169	0.597445	0.653906	1.05129	1.03758	1.03398	1.05872	0.937664	0.966373	1.03816	0.978976	0.782789	0.826183	0.830181	0.824704	0.696886	0.70498	0.715921	0.765342	0.847198	0.931787	0.841156	0.866124	0.913879	0.971182	0.962639	0.995694	0.822241
RLB	0.876214	0.816151	0.938898	0.853541	0.897523	0.825684	0.896204	0.866347	0.917176	0.911385	0.982516	0.945912	0.841341	0.816211	0.858719	0.818652	0.961958	0.915723	0.971689	1.0024	0.812932	0.812115	0.804126	0.773592	0.912336	0.969953	0.983027	1.02483	0.987603	1.03609	1.06221	1.03067	0.590991	0.615222	0.669155	0.729022	0.626252	0.633525	0.607411	0.589989	0.804097	0.813771	0.841963	0.789768	0.976512	0.938716	0.960319	0.945486	0.801
Glycerol	0.868127	0.879154	0.913671	0.834598	0.77343	0.725037	0.82695	0.853438	0.934083	1.00368	1.04468	1.02833	0.944625	0.939824	0.955341	0.947502	1.02407	1.04557	1.06861	1.01169	0.719766	0.731043	0.748111	0.817247	1.08487	1.0146	1.09412	0.992967	0.897279	0.892108	0.866164	0.911452	1.21722	1.1657	1.15328	1.13576	1.08579	1.06477	1.04543	1.137	1.11581	1.08372	1.15319	1.12009	1.02016	1.02474	1.04412	0.99263	1.10199
Galactose	0.80703	0.94508	0.895843	0.859808	0.932612	0.975937	0.988398	0.864151	0.869948	1.03957	0.993903		1.17463	1.18877	1.17968	1.1753	0.982939	0.948359	0.989192	1.00805	0.834587	0.835805	0.930352	1.04196	0.964025	0.967882	1.0038	0.96139	0.935395	0.952686	0.879436	0.889897	1.19588	1.28476	1.17028	1.16999	1.20853	1.20138	1.26284	1.15354	0.816656	0.850175		0.849633	1.10679	1.05438	1.09911	1.03973	0.976019
Medium	Fig 6B
	Rel R of mutants
	Δrrn1				Δrrn2				Δrrn3				Δrrn4				Δrrn4'				ΔasnU (GUU)				ΔasnU ΔrRNA4				ΔasnV (GUU)				ΔasnV ΔrRNA4				ΔtyrV (GUA)				ΔtyrV ΔrRNA4				ΔleuX (CAA)				ΔleuX ΔrRNA4
TB	1.12517	1.09781	0.912919	0.886571	0.989576	0.963195	0.975312	0.999308	0.939131	0.983372	0.956014	0.976119	0.803549	0.809778	0.806675	0.798637	0.748931	0.783759	0.7727	0.755321	1.19156	1.10845	1.12026	1.09322	0.85268	0.833413	0.850921	0.827547	0.898889	0.936987	0.944329	0.943602	0.740872	0.744721	0.796311	0.810024	1.07959	1.09633	0.937953	1.09264	0.777103	0.790354	0.826628	0.803646	0.898191	0.937264	0.935789	0.906308	0.796804
RLB	0.990973	0.936481	0.964906	0.950596	1.00274	0.941945	1.02309	1.0095	0.943242	0.973475	0.983424	0.986196	0.791926	0.79839	0.804906	0.798498	0.631886	0.744854	0.7539	0.761054	0.911533	1.03855	1.01377	0.963398	0.81739	0.80379	0.795642	0.808336	0.939197	0.933074	0.975715	0.986635	0.764038	0.759932	0.780858	0.814268	0.827143	0.806877	0.862369	0.870236	0.825004	0.775775	0.738019	0.799157	0.836562	0.886827	0.945134	0.910528	0.722669
Glycerol	0.879729	0.92238	0.949349	0.913251	1.21122	1.17748	1.1889	1.20591	1.34142	1.34945	1.34922	1.3385	1.47144	1.47846	1.47885	1.48796	1.67532	1.50695	1.4322	1.44451	0.902574	0.910056	0.921668	0.968186	1.39739	1.37087	1.30719	1.37923	0.925199	0.91723	0.932469	0.957556	1.43357	1.4578	1.36877	1.461	0.982308	0.942378	0.93342	0.929343	1.38671	1.41489	1.33781	1.39337	0.805435	0.866166	0.897418	0.902819	1.60692
Galactose	1.36691	1.02027	1.05708	0.989215	1.75967	1.81818	1.74744	2.0013	2.28216	2.10552	2.10724	2.09046	2.35535	2.31356	2.33028	2.27522	2.36905	2.30313	2.5061	2.43346	1.15371	0.925689	0.849792	0.991697	2.14076	2.09018	2.03942	2.3723	1.00844	0.955055	0.875556	0.851004	2.20374	2.18579	2.26848	2.32887	1.17901	1.09988	1.08326	1.08805	2.00162	2.08768	1.97315	1.97416	0.616334	0.552241	0.576462	0.545916	2.39677
[truncated: 19 more columns]
