# Supplementary material for: The layered costs and benefits of translational redundancy
Source: eLife. 2023 Mar 2;12:e81005. doi: 10.7554/eLife.81005 (PMC9981150; doi:10.7554/eLife.81005)
Supplement: Supplementary file 2. [file elife-81005-supp2.xlsx]

## Sheet: Statistics_Figure_2
		Rel R																											Rel K
		LB			TB			GA 0.8			GA 1.6			Lactose			Succinate			Glycerol			Gal						LB			TB			GA 0.8			GA 1.6			Lactose			Succinate			Glycerol
		Mean Diff.	Summary	Adjusted P Value	Mean Diff.	Summary	Adjusted P Value	Mean Diff.	Summary	Adjusted P Value	Mean Diff.	Summary	Adjusted P Value	Mean Diff.	Summary	Adjusted P Value	Mean Diff.	Summary	Adjusted P Value	Mean Diff.	Summary	Adjusted P Value	Mean Diff.	Summary	Adjusted P Value				Mean Diff.	Summary	Adjusted P Value	Mean Diff.	Summary	Adjusted P Value	Mean Diff.	Summary	Adjusted P Value	Mean Diff.	Summary	Adjusted P Value	Mean Diff.	Summary	Adjusted P Value	Mean Diff.	Summary	Adjusted P Value	Mean Diff.	Summary	Adjusted P Value
Set I	ΔproL (GGG)	0.03491	ns	0.8666	0.05257	ns	0.355	0.05399	ns	0.0667	0.0149	ns	0.9988	0.05267	ns	0.4248	-0.2464	****	<0.0001	0.1183	****	<0.0001	-0.239	***	0.0002		Set I	ΔproL (GGG)	-0.009323	ns	0.9998	-0.03382	ns	0.9944	-0.02516	ns	0.9989	0.04531	ns	0.9773	-0.03505	ns	0.9939	0.03687	ns	0.5786	-0.1092	ns	0.1485
	ΔleuV (CAG)	0.05628	ns	0.2757	-0.07819	ns	0.0644	0.01347	ns	0.9989	0.1015	****	<0.0001	0.0303	ns	0.9681	-0.000998	ns	>0.9999	0.07302	*	0.039	0.09557	ns	0.478			ΔleuV (CAG)	0.03643	ns	0.999	0.01409	ns	0.9995	-0.02849	ns	0.9952	0.1526	**	0.0063	0.04084	ns	0.9797	0.02825	ns	0.8739	-0.01635	ns	0.9995
	ΔasnT (GUU)	-0.1014	**	0.0022	-0.0465	ns	0.5232	0.04415	ns	0.2192	0.2834	****	<0.0001	0.06265	ns	0.2139	-0.03601	ns	0.99	-0.2092	****	<0.0001	-0.146	ns	0.0589			ΔasnT (GUU)	-0.4053	****	<0.0001	-0.217	****	<0.0001	-0.05511	ns	0.7307	-0.02203	ns	0.9993	-0.06095	ns	0.6982	0.01561	ns	0.996	-0.08532	ns	0.4285
	ΔasnU (GUU)	0.00828	ns	0.9996	0.1094	***	0.0007	0.1331	****	<0.0001	0.3038	****	<0.0001	0.1542	****	<0.0001	-0.3174	****	<0.0001	-0.1609	****	<0.0001	-0.3284	****	<0.0001			ΔasnU (GUU)	-0.6444	****	<0.0001	-0.02449	ns	0.999	-0.02631	ns	0.9988	0.03944	ns	0.9889	0.2747	****	<0.0001	0.04368	ns	0.3513	-0.1633	**	0.0048
	ΔasnV (GUU)	0.0146	ns	0.9991	-0.02444	ns	0.9943	0.02517	ns	0.8915	0.2248	****	<0.0001	-0.008272	ns	0.9996	-0.1504	**	0.0048	-0.1444	****	<0.0001	-0.2914	****	<0.0001			ΔasnV (GUU)	-0.1656	*	0.0295	-0.05416	ns	0.8403	-0.03754	ns	0.9825	-0.01395	ns	0.9996	-0.3379	****	<0.0001	0.009125	ns	0.9994	-0.2356	****	<0.0001
	ΔasnW (GUU)	-0.04635	ns	0.532	-0.06466	ns	0.1348	0.08683	***	0.0003	0.236	****	<0.0001	0.262	****	<0.0001	0.06971	ns	0.5786	-0.1392	****	<0.0001	-0.04591	ns	0.9941			ΔasnW (GUU)	-0.2636	****	<0.0001	-0.006241	ns	0.9998	0.01341	ns	0.9995	0.05714	ns	0.8654	-0.4093	****	<0.0001	-0.06027	ns	0.0656	-0.2799	****	<0.0001
	ΔglnX (CUG)	-0.1392	****	<0.0001	-0.02868	ns	0.9849	-0.0002108	ns	>0.9999	0.1975	****	<0.0001	-0.06892	ns	0.129				-0.09411	**	0.0026	0.2189	***	0.0006			ΔglnX (CUG)	-0.04613	ns	0.9944	-0.04241	ns	0.9739	-0.05449	ns	0.7441	0.05522	ns	0.8915	-0.0579	ns	0.7602				-0.1745	**	0.002
	ΔargQ (ACG)	-0.02426	ns	0.9887	0.1297	****	<0.0001	-0.05701	*	0.0441	0.2139	****	<0.0001	0.02995	ns	0.9716	0.007298	ns	0.9997	-0.1315	****	<0.0001	-0.1089	ns	0.3045			ΔargQ (ACG)	-0.0298	ns	0.9992	-0.01382	ns	0.9995	0.03109	ns	0.9943	0.04098	ns	0.9877	-0.1872	****	<0.0001	-0.01683	ns	0.9952	-0.2523	****	<0.0001
	ΔtyrV (GUA)	0.16	****	<0.0001	0.09262	**	0.0064	0.1194	****	<0.0001	0.1045	****	<0.0001	-0.08472	*	0.0286	0.1356	*	0.015	0.06392	ns	0.1616	-0.1309	ns	0.1224			ΔtyrV (GUA)	0.008074	ns	0.9998	-0.02765	ns	0.9989	-0.004679	ns	0.9998	-0.1648	**	0.0024	0.009093	ns	0.9997	-0.05198	ns	0.1634	0.07438	ns	0.6186
	ΔserX (GGA)	-0.01136	ns	0.9994	-0.07824	*	0.0348	-0.04038	ns	0.3213	0.1861	****	<0.0001	-0.0007917	ns	>0.9999	-0.003124	ns	>0.9999	-0.06753	ns	0.0711	-0.1418	ns	0.0726			ΔserX (GGA)	0.01384	ns	0.9997	0.01698	ns	0.9994	0.07435	ns	0.3296	0.0151	ns	0.9995	0.08781	ns	0.2232	0.09632	***	0.0003	-0.01661	ns	0.9995
	ΔserW (GGA)	0.02661	ns	0.9848	-0.02049	ns	0.9952	-0.09509	****	<0.0001	0.19	****	<0.0001	0.03769	ns	0.8444	0.09889	ns	0.1584	-0.01942	ns	0.9952	0.008954	ns	0.9998			ΔserW (GGA)	0.04325	ns	0.995	0.01476	ns	0.9995	0.004055	ns	0.9999	-0.009331	ns	0.9997	0.07701	ns	0.3804	0.1071	****	<0.0001	-0.07493	ns	0.6084
	ΔaspV (GUC)	-0.06896	ns	0.0938	0.02352	ns	0.9939	-0.1123	****	<0.0001	0.0445	ns	0.272	0.01298	ns	0.9993	-0.01005	ns	0.9997	-0.1878	****	<0.0001	-0.05255	ns	0.9947			ΔaspV (GUC)	-0.06142	ns	0.9573	-0.02711	ns	0.9989	-0.03026	ns	0.9946	0.08177	ns	0.426	-0.04304	ns	0.9667	-0.1198	****	<0.0001	0.0742	ns	0.6218
	ΔthrT (GGU)	-0.05472	ns	0.3094	-0.08639	*	0.0138	-0.08051	***	0.0009	0.1476	****	<0.0001	0.01246	ns	0.9994	-0.2228	****	<0.0001	-0.05923	ns	0.161	-0.3785	****	<0.0001			ΔthrT (GGU)	0.03979	ns	0.9958	-0.03906	ns	0.9864	0.05584	ns	0.7146	0.01607	ns	0.9995	0.1101	ns	0.0572	0.05117	ns	0.1774	0.07052	ns	0.6887
	ΔpheV (GAA)	0.04397	ns	0.605	-0.007739	ns	0.9996	0.06263	*	0.0192	0.1823	****	<0.0001	0.1973	****	<0.0001	-0.1327	*	0.0186	0.1329	****	<0.0001	-0.9327	****	<0.0001			ΔpheV (GAA)	-0.02614	ns	0.9993	0.01342	ns	0.9996	-0.08589	ns	0.1722	0.01347	ns	0.9996	-0.1511	**	0.0022	-0.09215	***	0.0007	-0.211	***	0.0001
	ΔpheU (GAA)	0.07608	*	0.0462	0.07265	ns	0.0628	-0.07665	**	0.0018	0.2458	****	<0.0001	-0.0958	**	0.0084	-0.3489	****	<0.0001	-0.1419	****	<0.0001	-0.2673	****	<0.0001			ΔpheU (GAA)	-0.0545	ns	0.9855	-0.07127	ns	0.502	-0.1223	*	0.0114	-0.006638	ns	0.9998	-0.01187	ns	0.9996	0.06685	*	0.0289	-0.009964	ns	0.9997
Set II	ΔproK (GGG)	-0.05585	ns	0.285	0.009197	ns	0.9995	-0.09388	****	<0.0001	0.1393	****	<0.0001	0.02421	ns	0.9941	-0.02828	ns	0.9989	-0.1243	****	<0.0001	0.07275	ns	0.8234		Set II	ΔproK (GGG)	0.0545	ns	0.9855	0.005033	ns	0.9998	-0.004783	ns	0.9998	0.1237	*	0.0481	0.06757	ns	0.56	-0.005898	ns	0.9996	-0.1309	*	0.0436
	ΔserU (CGA)	-0.1101	***	0.0007	0.04522	ns	0.5622	-0.08889	***	0.0002	0.196	****	<0.0001	0.0303	ns	0.9682	-0.06682	ns	0.6352	-0.13	****	<0.0001	-0.03513	ns	0.999			ΔserU (CGA)	0.0199	ns	0.9995	-0.03349	ns	0.9944	-0.04554	ns	0.9076	0.02607	ns	0.9991	-0.01678	ns	0.9994	0.1286	****	<0.0001	-0.03177	ns	0.9988
	ΔglyU (CCC)	-0.1055	**	0.0013	-0.05396	ns	0.3216	-0.1035	****	<0.0001	0.1531	****	<0.0001	0.008535	ns	0.9996	-0.1117	ns	0.0755	-0.1649	****	<0.0001	-0.3998	****	<0.0001			ΔglyU (CCC)	-0.009611	ns	0.9997	-0.05013	ns	0.9012	-0.1644	***	0.0002	0.06397	ns	0.7536	-0.04336	ns	0.9645	0.02236	ns	0.9785	-0.1449	*	0.0176
	ΔthrW (CGU)	-0.006498	ns	0.9997	0.01809	ns	0.9989	0.05127	ns	0.0952	0.08728	***	0.0006	-0.06588	ns	0.1661	0.04987	ns	0.9192	-0.0882	**	0.0059	-0.03864	ns	0.9958			ΔthrW (CGU)	0.03422	ns	0.999	-0.003154	ns	>0.9999	0.01404	ns	0.9994	-0.005964	ns	0.9998	0.03192	ns	0.9948	0.0276	ns	0.8909	0.1005	ns	0.2271
	ΔleuX (CAA)	-0.02378	ns	0.9894	-0.09	**	0.0089	-0.1398	****	<0.0001	0.1874	****	<0.0001	-0.006634	ns	0.9997	0.2249	****	<0.0001	-0.2381	****	<0.0001	0.1621	*	0.0246			ΔleuX (CAA)	0.01403	ns	0.9997	0.04026	ns	0.9843	-0.103	ns	0.0537	0.0457	ns	0.9756	-0.1551	**	0.0015	-0.07359	*	0.0115	-0.05762	ns	0.8927
Set III	ΔvalUXY (UAC)	0.1633	****	<0.0001	0.1645	****	<0.0001	-0.02449	ns	0.9097	0.1013	****	<0.0001	-0.06575	ns	0.1677				-0.07735	*	0.0236	0.07958	ns	0.7251		Set III	ΔvalUXY (UAC)	0.2553	***	0.0001	0.07516	ns	0.4282	0.05365	ns	0.7622	0.13	*	0.032	0.2717	****	<0.0001				0.08177	ns	0.4873
	ΔleuVPQ (CAG)	0.27	****	<0.0001	0.2164	****	<0.0001	0.03704	ns	0.4348	0.3329	****	<0.0001	0.02295	ns	0.9946	-0.06222	ns	0.7243	-0.2494	****	<0.0001	-0.2227	***	0.0005			ΔleuVPQ (CAG)	0.07699	ns	0.8054	0.0003355	ns	>0.9999	0.02236	ns	0.9991	0.1145	ns	0.0847	-0.03742	ns	0.9875	-0.0439	ns	0.345	-0.02672	ns	0.9991
	ΔglyVXY (GCC)	0.185	****	<0.0001	0.2395	****	<0.0001	0.1262	****	<0.0001	0.4493	****	<0.0001	0.06224	ns	0.2208	-0.2309	****	<0.0001	-0.2807	****	<0.0001	-0.7451	****	<0.0001			ΔglyVXY (GCC)	-0.08208	ns	0.7343	-0.2468	****	<0.0001	-0.1562	***	0.0005	0.03588	ns	0.9946	-0.06329	ns	0.6494	0.07767	**	0.0064	-0.09653	ns	0.2713
	Signinficantly better than the WT
	Signinficantly Poorer than the WT
	P value adjusted for multiple comparisons using Dunett's test
	Mean differences between mutant and WT
[truncated: 29 more columns]

## Sheet: Statistics_Figure_3
Rel R of mutants, calculated as described for Fig 2, in the second medium noted in each column (e.g. in TB to Gly, growth rate given is measured in Gly)
	Experiment 1							Experiment 2
	Downshift				Upshift			Downshift			Upshift
	TB to Gal				Gal to TB			TB to Gly			Gly to TB
		Mean Diff.	Summary	Adjusted P Value	Mean Diff.	Summary	Adjusted P Value	Mean Diff.	Summary	Adjusted P Value	Mean Diff.	Summary	Adjusted P Value
Set I	ΔproL (GGG)	-0.2917	*	0.0486	0.09994	ns	0.15	0.01574	ns	0.9996	0.08044	ns	0.1527
	ΔleuV (CAG)	-0.06531	ns	0.999	0.002782	ns	>0.9999	0.09423	ns	0.78	-0.02536	ns	0.9955
	ΔasnT (GUU)	-0.1514	ns	0.8522	-0.1055	ns	0.108	-0.1712	*	0.0459	-0.09418	ns	0.0537
	ΔasnU (GUU)	-0.1434	ns	0.896	-0.09744	ns	0.1726	0.01642	ns	0.9996	-0.02104	ns	0.999
	ΔasnV (GUU)	-0.2149	ns	0.2972	0.024	ns	0.9991	-0.126	ns	0.2874	-0.0281	ns	0.9945
	ΔasnW (GUU)	-0.089	ns	0.9942	-0.04613	ns	0.9699	-0.1019	ns	0.5786	-0.1027	*	0.0258
	ΔglnX (CUG)	0.1074	ns	0.9835	-0.04692	ns	0.9641	-0.1039	ns	0.5505	-0.07838	ns	0.1757
	ΔargQ (ACG)	-0.304	*	0.0343	0.114	ns	0.1079	-0.08823	ns	0.7673	-0.1065	*	0.0182
	ΔtyrV (GUA)	-0.08686	ns	0.9944	0.2282	****	<0.0001	0.05525	ns	0.9943	0.12	**	0.0048
	ΔserX (GGA)	-0.009444	ns	0.9999	-0.002312	ns	>0.9999	0.06717	ns	0.9639	0.009095	ns	0.9996
	ΔserW (GGA)	-0.02832	ns	0.9996	-0.09674	ns	0.1793	0.0355	ns	0.9991	-0.004164	ns	0.9999
	ΔaspV (GUC)	-0.2294	ns	0.222	-0.04826	ns	0.9772	0.03462	ns	0.9992	-0.06154	ns	0.4705
	ΔthrT (GGU)	-0.1007	ns	0.987	-0.04982	ns	0.9401	0			-0.1216	**	0.0041
	ΔpheV (GAA)	-0.4713	***	0.0001	0.06151	ns	0.7668	-0.1154	ns	0.4021	0
	ΔpheU (GAA)	-0.3687	**	0.0045	0.1867	***	0.0002	-0.1558	ns	0.0919	0.2176	****	<0.0001
Set II	ΔproK (GGG)	-0.4023	**	0.0014	-0.08764	ns	0.2867	-0.01151	ns	0.9997	0.04745	ns	0.81
	ΔserU (CGA)	-0.1865	ns	0.4907	-0.08708	ns	0.2945	-0.05771	ns	0.9874	0.05687	ns	0.5823
	ΔglyU (CCC)	-0.1579	ns	0.7216	-0.1013	ns	0.1385	-0.1239	ns	0.3081	-0.0512	ns	0.7231
	ΔthrW (CGU)	0.08701	ns	0.9944	0.03953	ns	0.988	0.9952	****	<0.0001	0.06062	ns	0.4917
	ΔleuX (CAA)	-0.4443	***	0.0003	0.01505	ns	0.9995	-0.1139	ns	0.4202	-0.02834	ns	0.9944
Set III	ΔvalUXY (UAC)	0.2302	ns	0.2181	0.1329	*	0.0165	-0.1085	ns	0.4893	0.1096	*	0.0136
	ΔleuVPQ (CAG)	-0.285	ns	0.0583	0.1849	***	0.0002	-0.1453	ns	0.1419	0.2213	****	<0.0001
	ΔglyVXY (GCC)	-1.309	****	<0.0001	0.3003	****	<0.0001	-0.3322	****	<0.0001	0.3169	****	<0.0001
Set IV	Δrrn1	0.008275	ns	>0.9999	-0.176	*	0.0214	0.1636	***	0.0009	0.01952	ns	0.9976
	Δrrn2	-0.03799	ns	0.9969	0.2722	***	0.0003	0.1533	***	0.0008	-0.1981	*	0.0136
	Δrrn3	-0.02794	ns	0.9993	0.212	**	0.0028	-0.08769	ns	0.054	-0.1434	ns	0.0906
	Δrrn4'	-0.2873	*	0.031	-0.0115	ns	0.9997	-0.1145	**	0.0097	-0.01211	ns	0.9997
	Δrrn4	-0.6194	****	<0.0001	0.2327	**	0.0012	-0.3339	****	<0.0001	0.2304	**	0.0042
		Signinficantly better than the WT			DS = downshift, rich to poor medium
		Signinficantly Poorer than the WT			US = upshift, porr to rich medium
		P value adjusted for multiple comparisons using Dunett's test

## Sheet: Statistics_Figure_4_1
Pairwise comparisons of the expression levels of tRNA types in the mature tRNA pool. Using the aligned YAMAT-seq read data as input, DESeq2 output consists of: baseMean1 and baseMean2 (the normalized mean expression level of three replicates of strain 1 and strain 2); fold.change1 and fold.change2 (fold change calculated by baseMean1/baseMean2 or baseMean2/baseMean1, respectively); log2.fold.chan…
rich_vs_poor
1: MG1655 wild type in rich LB versus MG1655 wild type in poor medium (M9+0.05% Galactose)											Higher in rich		2: delglyVXY in rich LB versus delglyVXY in poor medium (M9+0.05% Galactose)											Higher in rich		3: delleuVPQ in rich LB versus delleuVPQ in poor medium (M9+0.05% Galactose)											Higher in rich		4: delglyU in rich LB versus delglyU in poor medium (M9+0.05% Galactose)
Result: 6 isotypes more highly expressed in rich medium; 10 in poor											Higher in poor		Result: 10 isotypes more highly expressed in rich medium; 9 in poor											Higher in poor		Result: 15 isotypes more highly expressed in rich medium; 12 in poor											Higher in poor		Result: 11 isotypes more highly expressed in rich medium; 11 in poor
contig	baseMeanWTpoor	baseMeanWTrich	Fold.change1(rich/poor)	Fold.change2(poor/rich)	log2FoldChange1	log2FoldChange2	pvalue	padj	baseMean	lfcSE	stat	notes	contig	baseMeanglyVXYpoor	baseMeanglyVXYrich	Fold.change1(rich/poor)	Fold.change2(poor/rich)	log2FoldChange1	log2FoldChange2	pvalue	padj	baseMean	lfcSE	stat	notes	contig	baseMeanleuVPQpoor	baseMeanleuVPQrich	Fold.change(rich/poor)	Fold.change(poor/rich)	log2FoldChange1	Log2foldchange2	pvalue	padj	baseMean	lfcSE	stat	notes	contig	baseMeanglyUpoor	baseMeanglyUrich	Fold.change(rich/poor)	Fold.change(poor/rich)	log2FoldChange1	Log2foldchange2	pvalue	padj	baseMean	lfcSE
Leu-UAA	358.481	50.7855	0.141669	7.05873	-2.81941	2.81941	7.099e-23	2.98158e-21	204.633	0.286135	9.84648	Higher in poor	Leu-UAA	551.393	133.327	0.2418	4.13565	-2.04812	2.04812	4.24328e-27	1.78218e-25	342.36	0.189932	10.7808	Higher in poor	Thr-CGU	2745.07	6044.26	2.20186	0.454162	1.13872	-1.13872	7.2752e-31	3.05559e-29	4394.67	0.0985381	-11.5513	Higher in rich	Gln-CUG	35629.6	66143.8	1.85643	0.538669	0.892528	-0.892528	1.51192e-21	6.35005e-20	50886.7	0.0936195
Trp-CCA	1236.51	396.979	0.321047	3.11481	-1.63915	1.63915	1.06387e-20	2.23412e-19	816.747	0.175827	9.32948	Higher in poor	Pro-GGG	2736.88	4479.24	1.63663	0.611013	0.710725	-0.710725	1.79883e-16	3.77755e-15	3608.06	0.086315	-8.23478	Higher in rich	Trp-CCA	1099.49	410.765	0.373595	2.6767	-1.42045	1.42045	1.1405e-27	2.39505e-26	755.13	0.130492	10.901	Higher in poor	Leu-UAA	334.597	55.1471	0.164816	6.06736	-2.60107	2.60107	8.92328e-20	1.87389e-18	194.872	0.285716
Phe-GAA	538.461	165.168	0.306741	3.26007	-1.7049	1.7049	5.71448e-19	8.00028e-18	351.814	0.191688	8.89745	Higher in poor	Trp-CCA	1051.42	365.92	0.348024	2.87336	-1.52274	1.52274	1.75795e-15	2.46113e-14	708.671	0.191343	7.95733	Higher in poor	Arg-CCU	193.279	545.77	2.82374	0.354141	1.49761	-1.49761	2.32799e-20	3.25919e-19	369.525	0.162242	-9.24612	Higher in rich	Val-UAC	67802.3	39229	0.57858	1.72837	-0.789413	0.789413	1.93388e-19	2.70744e-18	53515.7	0.0875529
Thr-CGU	2926.86	4910.24	1.67765	0.596073	0.746439	-0.746439	2.08363e-14	2.18781e-13	3918.55	0.0976309	-7.64536	Higher in rich	Phe-GAA	348.958	120.359	0.344911	2.8993	-1.53571	1.53571	1.41802e-12	1.04083e-11	234.658	0.216956	7.08228	Higher in poor	Arg-UCU	3921.75	2190.85	0.558642	1.79005	-0.840004	0.840004	7.49391e-16	7.86861e-15	3056.3	0.10416	8.06219	Higher in poor	Cys-GCA	14360.5	7414.64	0.516323	1.93677	-0.953653	0.953653	3.7333e-18	3.91996e-17	10887.5	0.109763
Leu-CAA	459.177	202.089	0.440112	2.27215	-1.18406	1.18406	6.89141e-11	5.78878e-10	330.633	0.18127	6.523	Higher in poor	Lys-UUU	27652.9	16036	0.579904	1.72442	-0.786113	0.786113	1.4869e-12	1.04083e-11	21844.4	0.111083	7.07571	Higher in poor	Glu-UUC	123082	75476.7	0.613225	1.63072	-0.705511	0.705511	1.86673e-12	1.56805e-11	99279.1	0.100157	7.04409	Higher in poor	Ser-CGA	435.103	141.445	0.325085	3.07612	-1.62111	1.62111	4.0382e-16	3.39209e-15	288.274	0.198967
Arg-CCU	180.934	384.626	2.12578	0.470416	1.08799	-1.08799	1.64426e-09	1.15098e-08	282.78	0.180437	-6.02954	Higher in rich	Cys-GCA	10427.2	6299.13	0.604104	1.65535	-0.727132	0.727132	1.06787e-12	1.04083e-11	8363.18	0.102087	7.12146	Higher in poor	Gln-CUG	26864.9	45066.7	1.67753	0.596116	0.746336	-0.746336	5.18892e-12	3.63225e-11	35965.8	0.108171	-6.90031	Higher in rich	Trp-CCA	1039.04	492.638	0.474126	2.10914	-1.07666	1.07666	1.86417e-12	1.30492e-11	765.841	0.15294
Cys-GCA	9064.77	4432.37	0.488967	2.04513	-1.03219	1.03219	3.65226e-09	2.19136e-08	6748.57	0.174995	5.89922	Higher in poor	Ser-CGA	349.472	115.303	0.329935	3.0309	-1.59975	1.59975	1.03343e-09	6.2006e-09	232.388	0.262407	6.10416	Higher in poor	Leu-UAA	314.182	117.347	0.373499	2.67738	-1.42082	1.42082	4.31652e-11	2.58991e-10	215.765	0.214869	6.59278	Higher in poor	Leu-UAG	4989.86	7856.34	1.57446	0.635138	0.654859	-0.654859	3.58425e-12	2.15055e-11	6423.1	0.0941642
Ser-CGA	286.693	90.197	0.314611	3.17852	-1.66836	1.66836	1.74379e-06	9.15491e-06	188.445	0.349441	4.78105	Higher in poor	Arg-UCU	3357.26	2142.37	0.638132	1.56707	-0.648073	0.648073	4.43193e-09	2.32676e-08	2749.82	0.110414	5.86721	Higher in poor	Leu-UAG	5304.16	8280.92	1.56121	0.640528	0.642666	-0.642666	7.57618e-11	3.97749e-10	6792.54	0.0986775	-6.50878	Higher in rich	Gln-UUG	40822.8	59903.8	1.46741	0.681472	0.553273	-0.553273	1.85921e-09	9.76086e-09	50363.3	0.0920643
Met-CAU	5493.75	8326.94	1.51571	0.659757	0.599993	-0.599993	3.65505e-06	1.70569e-05	6910.34	0.129566	-4.63009	Higher in rich	Gln-CUG	26607.9	42608.1	1.60133	0.62448	0.679274	-0.679274	1.22849e-08	5.73294e-08	34608	0.119265	-5.69573	Higher in rich	Cys-GCA	9646.93	5994.4	0.621379	1.60932	-0.686455	0.686455	1.15156e-10	5.37394e-10	7820.66	0.106418	6.44558	Higher in poor	Phe-GAA	540.457	193.802	0.358589	2.78871	-1.4796	1.4796	1.14359e-08	5.33673e-08	367.129	0.259617
Leu-UAG	4835.57	8033.4	1.66131	0.601934	0.732324	-0.732324	4.89012e-06	2.05385e-05	6434.48	0.160287	-4.56945	Higher in rich	Ala-GGC	28882.7	41113.4	1.42346	0.702512	0.509404	-0.509404	1.09714e-07	4.60801e-07	34998	0.0959383	-5.30985	Higher in rich	Ser-CGA	303.603	132.74	0.437217	2.2872	-1.19358	1.19358	1.18265e-09	4.96712e-09	218.172	0.195323	6.08258	Higher in poor	Ile2-CAU	1.83764	26.4846	14.4122	0.0693855	3.84922	-3.84922	5.43869e-08	2.28425e-07	14.1611	0.687164
Glu-UUC	118078	92846.6	0.786313	1.27176	-0.346824	0.346824	0.000355078	0.00135575	105462	0.0971121	3.5714	Higher in poor	Asn-GUU	84283.7	117631	1.39566	0.716508	0.480944	-0.480944	3.01908e-07	1.15274e-06	100957	0.0938934	-5.12225	Higher in rich	Met-CAU	5777.76	8591.16	1.48694	0.672524	0.572342	-0.572342	6.16389e-09	2.35349e-08	7184.46	0.0984368	-5.81225	Higher in rich	Leu-CAA	558.034	225.269	0.403684	2.47719	-1.3087	1.3087	1.29348e-07	4.93874e-07	391.652	0.248143
Gln-CUG	29278.2	45420.2	1.55133	0.644608	0.633505	-0.633505	0.000425783	0.00149024	37349.2	0.17979	-3.52356	Higher in rich	Arg-CCU	271.158	524.175	1.9331	0.517303	0.950918	-0.950918	4.27856e-07	1.4975e-06	397.666	0.188701	-5.05613	Higher in rich	Leu-CAA	415.449	224.159	0.539559	1.85336	-0.890146	0.890146	2.88749e-08	1.01062e-07	319.804	0.160549	5.54813	Higher in poor	Arg-CCU	265.395	510.144	1.9222	0.520236	0.942762	-0.942762	4.07896e-07	1.42764e-06	387.769	0.185576
Arg-UCU	3448.23	2595.58	0.752728	1.3285	-0.4098	0.4098	0.000477898	0.00154398	3021.9	0.117415	3.49285	Higher in poor	Ile-GAU	5867.8	4245.81	0.723577	1.38202	-0.466781	0.466781	1.50244e-05	4.85403e-05	5056.81	0.10775	4.32833	Higher in poor	Ala-GGC	21517.7	31396.2	1.45909	0.685358	0.54507	-0.54507	1.09225e-07	3.52882e-07	26457	0.102629	-5.31067	Higher in rich	Ala-GGC	25645.9	33737.2	1.3155	0.760166	0.395613	-0.395613	2.88824e-06	9.33123e-06	29691.6	0.0845464
Ala-GGC	21368.4	26980.7	1.26264	0.791989	0.336448	-0.336448	0.00130182	0.00390545	24174.6	0.104639	-3.21558	Higher in rich	Pro-CGG	502.742	779.048	1.5496	0.645328	0.631896	-0.631896	2.25779e-05	6.77338e-05	640.895	0.149685	-4.23774	Higher in rich	Gln-UUG	30763.9	42449.6	1.37985	0.724716	0.464512	-0.464512	1.96228e-06	5.88683e-06	36606.8	0.0976578	-4.75727	Higher in rich	Arg-UCU	3760.41	2675.69	0.711542	1.4054	-0.490979	0.490979	5.7347e-06	1.72041e-05	3218.05	0.108107
Ser-UGA	680.962	432.814	0.635592	1.57334	-0.653827	0.653827	0.00145582	0.0040763	556.888	0.205121	3.18335	Higher in poor	Leu-UAG	5220.86	7039.81	1.3484	0.74162	0.431248	-0.431248	6.30116e-05	0.000176432	6130.33	0.107784	-4.00124	Higher in rich	fMet-CAU	223.209	676.142	3.02919	0.330121	1.59893	-1.59893	1.49392e-05	4.18299e-05	449.675	0.368774	-4.32958	Higher in rich	Thr-CGU	3948.79	5443.62	1.37855	0.725399	0.463153	-0.463153	4.31805e-05	0.000120905	4696.2	0.113169
Val-UAC	53041.8	37270.6	0.702665	1.42315	-0.509091	0.509091	0.00279004	0.00732385	45156.2	0.170262	2.98997	Higher in poor	Gly-GCC	47740.3	60510.5	1.26749	0.78896	0.341977	-0.341977	0.00126904	0.00333122	54125.4	0.106111	-3.22289	Higher in rich	Leu-CAG	13682.8	18168.6	1.32784	0.753103	0.409082	-0.409082	2.65933e-05	6.72479e-05	15925.7	0.0973776	-4.20083	Higher in rich	Lys-UUU	45178.9	34701.3	0.768086	1.30194	-0.380661	0.380661	0.000163917	0.000430282	39940.1	0.101012
Ser-GCU	24501.5	17277.5	0.705159	1.41812	-0.503979	0.503979	0.00500073	0.0123547	20889.5	0.179548	2.80699		Gln-UUG	28655.5	36716	1.28129	0.780464	0.357596	-0.357596	0.00137019	0.00338518	32685.8	0.111716	-3.20086	Higher in rich	Ile2-CAU	1.17228	18.2128	15.5363	0.0643654	3.95757	-3.95757	2.72194e-05	6.72479e-05	9.69256	0.923406	-4.19556	Higher in rich	Arg-ACG	5734.21	4053.04	0.706817	1.41479	-0.500592	0.500592	0.000248653	0.000590942	4893.62	0.136743
Gln-UUG	31050.9	41107.6	1.32388	0.755358	0.404768	-0.404768	0.0101586	0.0233474	36079.3	0.157473	-2.57038		Leu-CAA	374.931	232.878	0.621121	1.60999	-0.687053	0.687053	0.00165059	0.00385138	303.905	0.218366	3.14682	Higher in poor	Leu-GAG	923.623	1733.03	1.87634	0.532952	0.907923	-0.907923	6.68321e-05	0.000155942	1328.33	0.227431	-3.98729	Higher in rich	Pro-CGG	682.274	1033.93	1.51542	0.659882	0.59972	-0.59972	0.000253261	0.000590942	858.104	0.164406
Leu-GAG	956.736	1400.17	1.46349	0.683298	0.549412	-0.549412	0.0105619	0.0233474	1178.45	0.215011	-2.55687		Thr-CGU	3144.41	4033.07	1.28262	0.779656	0.359091	-0.359091	0.00269617	0.00595996	3588.74	0.119982	-3.00041	Higher in rich	Phe-GAA	444.011	258.691	0.582623	1.71638	-0.779365	0.779365	7.50981e-05	0.000166006	351.351	0.197648	3.95953	Higher in poor	Gly-GCC	145378	175727	1.20876	0.827295	0.273527	-0.273527	0.00170949	0.00377887	160553	0.0872127
Pro-GGG	2182.84	2512.07	1.15082	0.868943	0.202667	-0.202667	0.0259699	0.0545368	2347.46	0.0910185	-2.22666		Thr-UGU	16204.1	13845.5	0.854442	1.17035	-0.226945	0.226945	0.00798166	0.0163221	15024.8	0.0854779	2.65284		Thr-GGU	11766.6	16227.5	1.37912	0.725102	0.463743	-0.463743	0.000397166	0.000834048	13997	0.130885	-3.54196	Higher in rich	Ser-GGA	18498.1	21918.4	1.1849	0.843952	0.244768	-0.244768	0.00290935	0.00609986	20208.2	0.0822129
fMet-CAU	212.748	444.266	2.08823	0.478875	1.06228	-1.06228	0.0315367	0.0630734	328.507	0.494285	-2.15023		Ser-UGA	535.436	747.324	1.39573	0.71647	0.481021	-0.481021	0.00824836	0.0163221	641.38	0.181698	-2.64173		His-GUG	194.636	304.9	1.56651	0.638361	0.647556	-0.647556	0.000525287	0.00105057	249.768	0.185222	-3.46752	Higher in rich	fMet-CAU	231.783	366.702	1.5821	0.632073	0.661838	-0.661838	0.00304993	0.00609986	299.243	0.221677
Arg-CCG	846.526	991.675	1.17146	0.853633	0.228312	-0.228312	0.0713685	0.124895	919.1	0.126375	-1.80313		Ile2-CAU	2.5577	12.4783	4.87874	0.204971	2.28651	-2.28651	0.00854966	0.0163221	7.51802	0.865751	-2.62956		Gly-UCC	17697.1	14131.1	0.798499	1.25235	-0.324638	0.324638	0.00170656	0.00325797	15914.1	0.103487	3.13705	Higher in poor	Val-GAC	5320.79	4297.37	0.807655	1.23815	-0.308188	0.308188	0.00329219	0.00628508	4809.08	0.104889
Pro-CGG	630.031	748.46	1.18797	0.841769	0.248503	-0.248503	0.0711081	0.124895	689.245	0.137117	-1.80479		Arg-ACG	5988.65	4223.43	0.705239	1.41796	-0.503816	0.503816	0.0586327	0.107068	5106.04	0.2664	1.89094		Arg-CCG	899.359	672.356	0.747595	1.33762	-0.41967	0.41967	0.00325786	0.00594913	785.858	0.142714	2.9423	Higher in poor	Pro-GGG	2376.65	2921.71	1.22934	0.813443	0.297887	-0.297887	0.0117809	0.021513	2649.18	0.118434
Leu-CAG	35002.5	41727.3	1.19212	0.838839	0.253535	-0.253535	0.0692517	0.124895	38364.9	0.139557	-1.81677		Leu-GAG	1096.21	1340.12	1.2225	0.817993	0.289839	-0.289839	0.0943156	0.165052	1218.17	0.173806	-1.67306		Val-UAC	53160.6	42772.2	0.804586	1.24288	-0.313681	0.313681	0.0035714	0.00624994	47966.4	0.107662	2.91373	Higher in poor	Glu-UUC	113321	100401	0.885987	1.12869	-0.174643	0.174643	0.0232644	0.0407126	106861	0.0769551
His-GUG	169.882	237.667	1.39902	0.714788	0.484414	-0.484414	0.143865	0.241694	203.774	0.33282	-1.46155		Val-UAC	63609.3	55913.3	0.879013	1.13764	-0.186044	0.186044	0.101438	0.169512	59761.3	0.113577	1.63792		Thr-UGU	16822.5	20323.3	1.2081	0.827745	0.272742	-0.272742	0.00399653	0.00671417	18572.9	0.0947479	-2.87844	Higher in rich	Met-CAU	6579.31	7885.09	1.19847	0.834399	0.26119	-0.26119	0.0243982	0.0409889	7232.2	0.115999
Ile-GAU	7651.08	6866.59	0.897466	1.11425	-0.156071	0.156071	0.185472	0.299609	7258.83	0.117978	1.32409		Arg-CCG	836.109	980.622	1.17284	0.852631	0.230007	-0.230007	0.104936	0.169512	908.365	0.142443	-1.62138		Ser-GCU	23882.3	15884.5	0.665116	1.5035	-0.588322	0.588322	0.00524075	0.00846583	19883.4	0.210717	2.79185	Higher in poor	Gly-UCC	15674.5	18106.1	1.15513	0.865704	0.208055	-0.208055	0.0312264	0.0504427	16890.3	0.0966458
Lys-UUU	29184.1	26497.3	0.907937	1.1014	-0.139336	0.139336	0.230874	0.359137	27840.7	0.116302	1.19811		Met-CAU	6121.81	6726.09	1.09871	0.910158	0.135811	-0.135811	0.148151	0.230456	6423.95	0.0941725	-1.44609		Pro-CGG	590.837	805.754	1.36375	0.733272	0.44758	-0.44758	0.00547993	0.00852433	698.295	0.161831	-2.77738	Higher in rich	Leu-GAG	736.353	948.127	1.2876	0.77664	0.364682	-0.364682	0.053243	0.0828225	842.24	0.189218
Ile2-CAU	1.43059	17.0291	11.9036	0.0840084	3.57332	-3.57332	0.255212	0.382818	9.22987	3.14187	-1.13778		Gly-UCC	17293.8	15870.2	0.917681	1.0897	-0.123935	0.123935	0.16179	0.242686	16582	0.0886528	1.39908		Gly-CCC	6387.13	5407.63	0.846644	1.18113	-0.240172	0.240172	0.00763676	0.0114551	5897.38	0.0899647	2.66772		Thr-UGU	25512.6	22496	0.881762	1.13409	-0.181538	0.181538	0.0880653	0.132098	24004.3	0.106484
Arg-ACG	6622.29	5661.54	0.854921	1.1697	-0.226137	0.226137	0.334674	0.468544	6141.91	0.234327	0.964741		Sec-UCA	76.8281	54.128	0.704534	1.41938	-0.505259	0.505259	0.171938	0.249013	65.4781	0.372461	1.366		Ala-UGC	54075.3	64102.1	1.18542	0.843581	0.245401	-0.245401	0.0181042	0.0262199	59088.7	0.103825	-2.36348		Ser-GCU	23197	20267.1	0.873695	1.14456	-0.194799	0.194799	0.0988087	0.143102	21732	0.117954
Asn-GUU	73455.7	65285.6	0.888776	1.12514	-0.170109	0.170109	0.331117	0.468544	69370.7	0.175038	0.971867		Ser-GCU	22586.7	24601.9	1.08922	0.918085	0.1233	-0.1233	0.221223	0.309712	23594.3	0.100829	-1.22328		Ile-GAU	7162.84	8084.67	1.1287	0.885978	0.174658	-0.174658	0.0501161	0.0701626	7623.76	0.0891426	-1.95897		Arg-CCG	722.386	891.223	1.23372	0.810556	0.303017	-0.303017	0.116051	0.162471	806.804	0.194183
Tyr-GUA	114.691	88.922	0.775317	1.28979	-0.367141	0.367141	0.377125	0.510943	101.807	0.415053	0.883206		Ala-UGC	53768.2	58193.3	1.0823	0.923959	0.114099	-0.114099	0.259587	0.351698	55980.8	0.101209	-1.12737		Gly-GCC	153447	137277	0.894625	1.11779	-0.160645	0.160645	0.0783377	0.106135	145362	0.091252	1.76041		Thr-GGU	15463.1	13989.4	0.904696	1.10534	-0.144496	0.144496	0.15774	0.213712	14726.2	0.102412
Ser-GGA	17255.9	18531.4	1.07391	0.931173	0.102878	-0.102878	0.42152	0.553245	17893.7	0.128015	-0.803787		Thr-GGU	13479.3	12705.6	0.942603	1.06089	-0.0852778	0.0852778	0.420477	0.551876	13092.5	0.105798	0.805594		Asp-GUC	131164	119190	0.90871	1.10046	-0.138108	0.138108	0.152834	0.200594	125177	0.0965936	1.42959		Pro-UGG	2861.95	3160.79	1.10442	0.905453	0.143289	-0.143289	0.163456	0.214536	3011.37	0.103164
Asp-GUC	128490	119178	0.927527	1.07814	-0.108539	0.108539	0.464924	0.591722	123834	0.14853	0.730763		Tyr-GUA	92.2378	84.2773	0.913696	1.09446	-0.130214	0.130214	0.686692	0.791423	88.2576	0.327962	0.403349		Sec-UCA	81.742	62.8347	0.768696	1.30091	-0.379516	0.379516	0.183671	0.233763	72.2884	0.279095	1.32954		Ser-UGA	747.913	615.858	0.823435	1.21443	-0.280274	0.280274	0.175557	0.223436	681.886	0.208489
Gly-UCC	15456.9	16632.6	1.07606	0.929313	0.105764	-0.105764	0.484257	0.5982	16044.7	0.151171	-0.699472		His-GUG	211.585	197.355	0.932748	1.0721	-0.100441	0.100441	0.682444	0.791423	204.47	0.239195	0.409131		Lys-UUU	32807.2	35537.8	1.08323	0.923164	0.115342	-0.115342	0.266076	0.328682	34172.5	0.103727	-1.11214		Tyr-GUA	117.582	100.014	0.850587	1.17566	-0.233469	0.233469	0.348843	0.430924	108.798	0.25029
Thr-UGU	16910.5	17622.7	1.04212	0.959587	0.0595147	-0.0595147	0.567736	0.681284	17266.6	0.104068	-0.571388		Glu-UUC	113788	111717	0.981808	1.01853	-0.0264878	0.0264878	0.734892	0.791423	112752	0.0782797	0.338625		Val-GAC	4900.33	4581.9	0.935019	1.0695	-0.0969322	0.0969322	0.357223	0.428088	4741.11	0.105784	0.920669		Leu-CAG	39118.6	41628.3	1.06416	0.939712	0.0897098	-0.0897098	0.496133	0.595359	40373.4	0.131891
Thr-GGU	12870.8	13848.4	1.07596	0.929407	0.105618	-0.105618	0.59697	0.696465	13359.6	0.199806	-0.528763		Gly-CCC	6800.72	6678.84	0.982078	1.01825	-0.0260899	0.0260899	0.727183	0.791423	6739.78	0.0746689	0.348875		Pro-GGG	2274.8	2422.58	1.06497	0.938996	0.0908086	-0.0908086	0.366932	0.428088	2348.69	0.100934	-0.902235		Sec-UCA	105.398	94.3177	0.894873	1.11748	-0.160245	0.160245	0.534828	0.623966	99.8578	0.266691
Ala-UGC	52375.2	54470.1	1.04	0.961539	0.0565833	-0.0565833	0.631282	0.71659	53422.6	0.117934	-0.479924		Ser-GGA	15351.6	15737.3	1.02512	0.975492	0.0357973	-0.0357973	0.693688	0.791423	15544.4	0.0903832	-0.393855		Asn-GUU	70666.6	66503.4	0.941087	1.0626	-0.0875995	0.0875995	0.397206	0.450883	68585	0.103418	0.846621		Gly-CCC	1.67387	3.08111	1.8407	0.54327	0.880258	-0.880258	0.583091	0.661887	2.37749	1.5897
Sec-UCA	74.0245	66.2001	0.8943	1.11819	-0.16117	0.16117	0.776477	0.850336	70.1123	0.563785	0.283913		Val-GAC	5182.33	5382.02	1.03853	0.962897	0.0545468	-0.0545468	0.633831	0.791423	5282.17	0.115604	-0.476342		Arg-ACG	6647.17	6286.93	0.945805	1.0573	-0.0803849	0.0803849	0.552188	0.579797	6467.05	0.135831	0.594485		Ile-GAU	8780.2	8473.15	0.965029	1.03624	-0.0513554	0.0513554	0.625408	0.691241	8626.67	0.105863
Gly-CCC	5494.16	5618.57	1.02264	0.977858	0.0323036	-0.0323036	0.789597	0.850336	5556.36	0.120718	-0.266833		fMet-CAU	249.919	285.186	1.14111	0.876339	0.190438	-0.190438	0.728243	0.791423	267.553	0.549014	-0.347464		Pro-UGG	2597.11	2507.13	0.965352	1.03589	-0.0508734	0.0508734	0.543799	0.579797	2552.12	0.0836333	0.607078		Asp-GUC	150329	154163	1.02551	0.975127	0.0363386	-0.0363386	0.650542	0.700584	152246	0.0802613
Pro-UGG	2566.66	2590.17	1.00916	0.990922	0.0131569	-0.0131569	0.886005	0.907614	2578.41	0.0901574	-0.143362		Pro-UGG	2708.24	2765.2	1.02103	0.979404	0.0300247	-0.0300247	0.764054	0.802257	2736.72	0.0999042	-0.300162		Tyr-GUA	103.422	115.209	1.11397	0.897693	0.155706	-0.155706	0.532685	0.579797	109.315	0.239567	-0.623913		Asn-GUU	83943	86066.9	1.0253	0.975323	0.0360488	-0.0360488	0.675288	0.709052	85004.9	0.0860859
Gly-GCC	152412	154641	1.01462	0.985589	0.020942	-0.020942	0.86772	0.907614	153527	0.125709	-0.166556		Asp-GUC	125592	127139	1.01232	0.98783	0.0176657	-0.0176657	0.810459	0.830227	126365	0.0736267	-0.239833		Ser-UGA	535.692	516.195	0.963604	1.03777	-0.0534881	0.0534881	0.710927	0.728267	525.944	0.135598	0.370611		His-GUG	218.337	216.694	0.992478	1.00758	-0.0108924	0.0108924	0.945482	0.951038	217.515	0.210683
Val-GAC	5249.39	5186.7	0.988058	1.01209	-0.0173329	0.0173329	0.914499	0.914499	5218.05	0.160983	0.107366		Leu-CAG	36975.5	37046.9	1.00193	0.998072	0.00278413	-0.00278413	0.983009	0.983009	37011.2	0.132556	-0.0212972		Ser-GGA	17926.7	17597.8	0.981653	1.01869	-0.0267154	0.0267154	0.790787	0.790787	17762.3	0.100412	0.265289		Ala-UGC	65737.8	65529.6	0.996833	1.00318	-0.00457643	0.00457643	0.951038	0.951038	65633.7	0.0749721
[truncated: 15 more columns]

## Sheet: Statistics_Figure_4_2
Pairwise comparisons of the expression levels of tRNA types in the mature tRNA pool. Using the aligned YAMAT-seq read data as input, DESeq2 output consists of: baseMean1 and baseMean2 (the normalized mean expression level of three replicates of strain 1 and strain 2); fold.change1 and fold.change2 (fold change calculated by baseMean1/baseMean2 or baseMean2/baseMean1, respectively); log2.fold.chan…
Isotypes marked with a * are those directly affected by engineering in one of the comaprison strains
WT_vs_eng_rich
1: MG1655 wild type in rich LB versus del-glyVXY in rich LB											Higher in wt		2: MG1655 wild type in rich LB versus del-leuVPQ in rich LB											Higher in wt		3: MG1655 wild type in rich LB versus del-glyU in rich LB											Higher in wt		4: MG1655 wild type in rich LB versus del-thrW in rich LB
Result: 4 isotypes more highly expressed in WT; 10 in del-glyVXY											Higher in delglyVXY		Result: 5 isotypes more highly expressed in WT; 1 in del-leuVPQ											Higher in delleuVPQ		Result: 4 isotypes more highly expressed in WT; 2 in del-glyU											Higher in delglyU		Result: 6 isotypes more highly expressed in WT; 6 in del-thrW
contig	baseMeanwtrich	baseMeanglyVXYrich	Fold.change(WT/glyVXY)	Fold.change(glyVXY/WT)	log2FoldChange1	log2FoldChange2	pvalue	padj	baseMean	lfcSE	stat	notes	contig	baseMeanwtrich	baseMeanleuVPQrich	Fold.change(wtrich/leuVPQrich)	Fold.change(leuVPQrich/WTrich)	log2FoldChange1	log2FoldChange2	pvalue	padj	baseMean	lfcSE	stat	notes	contig	baseMeanwtrich	baseMeanglyUrich	Fold.change(wtrich/glyUrich)	Fold.change(glyUrich/WTrich)	log2FoldChange1	log2FoldChange2	pvalue	padj	baseMean	lfcSE	stat	notes	contig	baseMeanwtrich	baseMeanthrWrich	Fold.change(wtrich/thrWrich)	Fold.change(thrWrich/WTrich)	log2FoldChange1	log2FoldChange2	pvalue	padj	baseMean	lfcSE
Gly-GCC*	160912	64472.8	2.49581	0.400671	1.31951	-1.31951	7.7111e-61	3.23866e-59	112692	0.0801898	16.4551	Higher in wt	Leu-CAG*	44126.7	17800.2	2.479	0.403389	1.30976	-1.30976	7.04309e-55	2.9581e-53	30963.5	0.0839471	15.6021	Higher in wt	Gly-CCC*	6308.06	2.97166	2122.74	0.000471088	11.0517	-11.0517	8.61161e-110	3.44464e-108	3155.52	0.49836	22.2621	Higher in wt	Thr-CGU*	4943.72	2.14283	2307.09	0.000433446	11.1719	-11.1719	2.52832e-76	1.03661e-74	2472.93	0.601711
Asn-GUU	67974.9	125183	0.543005	1.8416	-0.880963	0.880963	1.15039e-32	2.41582e-31	96578.9	0.0740172	-11.9024	Higher in delglyVXY	Arg-CCG	1047.42	658.811	1.58986	0.628988	0.668896	-0.668896	2.24479e-08	3.86951e-07	853.113	0.120128	5.59199	Higher in wt	Leu-GAG	1573.32	913.087	1.72308	0.580357	0.784987	-0.784987	4.91999e-06	9.83998e-05	1243.2	0.171917	4.56817	Higher in wt	Val-GAC	5223.59	3376.82	1.5469	0.646456	0.629377	-0.629377	3.97402e-07	8.14673e-06	4300.21	0.124151
Pro-GGG	2617.14	4770.31	0.54863	1.82272	-0.866094	0.866094	6.39479e-18	8.9527e-17	3693.73	0.100432	-8.62526	Higher in delglyVXY	Glu-UUC	98113.1	73951	1.32673	0.753732	0.407876	-0.407876	2.76393e-08	3.86951e-07	86032	0.0734205	5.55577	Higher in wt	Arg-ACG	6362.21	3903.82	1.62974	0.613594	0.704644	-0.704644	0.000100957	0.00100957	5133.01	0.181254	3.88828	Higher in wt	Cys-GCA	4449.11	7937.39	0.560525	1.78404	-0.835149	0.835149	3.21688e-06	4.39641e-05	6193.25	0.179346
Lys-UUU	27622	17047.9	1.62026	0.617185	0.696225	-0.696225	1.80561e-17	1.89589e-16	22335	0.0818512	8.50566	Higher in wt	Arg-UCU	2743.33	2146.61	1.27798	0.782485	0.353865	-0.353865	3.55657e-05	0.00037344	2444.97	0.085724	4.13455	Higher in wt	Val-GAC	5827.88	4139.68	1.40781	0.710324	0.493451	-0.493451	8.92397e-05	0.00100957	4983.78	0.125988	3.91813	Higher in wt	Gln-CUG	45598.1	69112	0.659771	1.51568	-0.599962	0.599962	1.31858e-05	0.000135154	57355.1	0.1377
Ala-GGC	28118.5	43812.5	0.641792	1.55814	-0.639822	0.639822	9.9186e-16	8.33162e-15	35965.5	0.0796972	-8.02786	Higher in delglyVXY	Lys-UUU	28022	34816	0.804861	1.24245	-0.313189	0.313189	0.000241521	0.00202878	31419	0.0853217	-3.67109	Higher in delleuVPQ	Cys-GCA	4977.74	7162.94	0.69493	1.43899	-0.525061	0.525061	0.000152911	0.00122328	6070.34	0.138725	-3.78629	Higher in delglyU	Gln-UUG	41317.3	58874.1	0.701791	1.42493	-0.510887	0.510887	2.33826e-05	0.000191737	50095.7	0.120778
Ser-UGA	450.539	793.51	0.56778	1.76125	-0.816597	0.816597	6.37688e-11	4.46382e-10	622.024	0.125225	-6.53463	Higher in delglyVXY	Gly-GCC	163322	134486	1.21441	0.823442	0.280261	-0.280261	0.00130899	0.00916295	148904	0.0872016	3.214	Higher in wt	Gln-UUG	46182.9	57807.1	0.798915	1.2517	-0.323887	0.323887	0.000197427	0.00131618	51995	0.0870186	-3.72229	Higher in delglyU	Arg-ACG	5710.64	3436.91	1.66156	0.601843	0.73254	-0.73254	4.02223e-05	0.000274852	4573.78	0.178433
Ile-GAU	7149.44	4525.31	1.57988	0.63296	0.659813	-0.659813	2.22521e-09	1.21291e-08	5837.38	0.110344	5.98045	Higher in wt	Gly-UCC	17569.3	13845.5	1.26895	0.788055	0.343631	-0.343631	0.00187874	0.0112724	15707.4	0.110568	3.10876		Gln-CUG	51011.5	63827.7	0.799206	1.25124	-0.32336	0.32336	0.00248037	0.0141736	57419.6	0.106878	-3.02573		Leu-GAG	1411.33	898.256	1.57119	0.63646	0.651859	-0.651859	0.000343768	0.0020135	1154.79	0.182164
Val-UAC	38927.9	59546.2	0.653742	1.52966	-0.613207	0.613207	2.31031e-09	1.21291e-08	49237.1	0.102634	-5.97433	Higher in delglyVXY	Leu-UAA	53.7005	114.939	0.467209	2.14037	-1.09786	1.09786	0.0031685	0.0166346	84.3197	0.372559	-2.9509		Arg-CCG	1113.21	859.787	1.29475	0.772351	0.372671	-0.372671	0.0100825	0.0504126	986.497	0.144625	2.57299		Asn-GUU	65566.5	83449.7	0.785701	1.27275	-0.347947	0.347947	0.000730596	0.00332827	74508.1	0.103008
Leu-UAA	52.8934	141.876	0.372814	2.68231	-1.42347	1.42347	5.11313e-08	2.38613e-07	97.3849	0.260881	-5.44733	Higher in delglyVXY	Arg-CCU	406.377	534.401	0.760435	1.31504	-0.395104	0.395104	0.00493861	0.0230468	470.389	0.141322	-2.81101		Met-CAU	9356.81	7600.38	1.2311	0.812283	0.299945	-0.299945	0.0236771	0.0947086	8478.6	0.132597	2.26233		Pro-CGG	751.236	1045.27	0.718702	1.3914	-0.476535	0.476535	0.000656091	0.00332827	898.252	0.139821
Ser-GCU	17955.3	26209.7	0.685062	1.45972	-0.545694	0.545694	7.88195e-07	3.31042e-06	22082.5	0.110504	-4.93827	Higher in delglyVXY	Cys-GCA	4680.55	5871.22	0.797202	1.25439	-0.326983	0.326983	0.00648775	0.0272486	5275.88	0.12029	-2.72205		Lys-UUU	29768.3	33466.2	0.889503	1.12422	-0.168929	0.168929	0.0225722	0.0947086	31617.2	0.0740563	-2.2806		Thr-GGU	13966.2	9887.36	1.41253	0.707947	0.498286	-0.498286	0.00101593	0.00416531	11926.8	0.151657
Glu-UUC	96703.7	118892	0.813375	1.22945	-0.298008	0.298008	8.82649e-07	3.37011e-06	107798	0.0606184	-4.91615	Higher in delglyVXY	Val-GAC	5487.92	4489.65	1.22235	0.818097	0.289657	-0.289657	0.0119304	0.0417565	4988.79	0.115319	2.5142		fMet-CAU	499.92	353.4	1.4146	0.706913	0.500395	-0.500395	0.0420319	0.135654	426.66	0.246871	2.0332		fMet-CAU	449.881	237.35	1.89544	0.527583	0.922529	-0.922529	0.00116618	0.00434667	343.615	0.28424
Cys-GCA	4614.12	6701.25	0.688546	1.45234	-0.538376	0.538376	1.99799e-06	6.99297e-06	5657.68	0.113294	-4.75363	Higher in delglyVXY	Phe-GAA	174.628	253.546	0.688742	1.45192	-0.537963	0.537963	0.0112762	0.0417565	214.087	0.212487	-2.53402		Leu-UAG	9026.94	7574	1.19183	0.839044	0.253182	-0.253182	0.0440876	0.135654	8300.47	0.12581	2.01326		Ser-UGA	434.607	636.121	0.683215	1.46367	-0.549589	0.549589	0.00208321	0.00711763	535.364	0.178265
Arg-CCU	400.339	557.894	0.71759	1.39355	-0.478768	0.478768	0.000114969	0.000371437	479.117	0.123857	-3.85661	Higher in delglyVXY	Ser-GGA	19576.5	17239.3	1.13558	0.880611	0.183423	-0.183423	0.034728	0.112198	18407.9	0.0868462	2.11152		Ser-UGA	486.049	594.656	0.817362	1.22345	-0.290952	0.290952	0.0386448	0.135654	540.353	0.141574	-2.06795		His-GUG	239.766	157.616	1.52121	0.657371	0.605219	-0.605219	0.00763455	0.0240782	198.691	0.227131
Thr-UGU	18385.1	14729.9	1.24815	0.801188	0.319788	-0.319788	0.000170078	0.000510235	16557.5	0.085061	3.75976	Higher in wt	Ser-GCU	18234.5	15559.1	1.17195	0.853277	0.228913	-0.228913	0.0475468	0.14264	16896.8	0.115516	1.9814		Leu-CAG	46873.4	40132.1	1.16798	0.856182	0.224011	-0.224011	0.0578775	0.15434	43502.7	0.118109	1.89662		Ser-CGA	90.3694	151.075	0.598175	1.67175	-0.741361	0.741361	0.0139534	0.0408635	120.722	0.302275
Gly-CCC	5844.94	7106.67	0.822459	1.21587	-0.281985	0.281985	0.00392366	0.0109863	6475.81	0.0977528	-2.88423		Pro-GGG	2654.36	2372.97	1.11858	0.893989	0.161672	-0.161672	0.0670067	0.161461	2513.66	0.0882922	1.83163		Asn-GUU	73321.1	83042.3	0.882936	1.13258	-0.179619	0.179619	0.0564406	0.15434	78181.7	0.0941645	-1.90762		Val-UAC	37572	30707.5	1.22355	0.817296	0.291069	-0.291069	0.0188053	0.0514013	34139.8	0.123901
Met-CAU	8686.73	7155.98	1.21391	0.823782	0.279665	-0.279665	0.00823838	0.0216258	7921.35	0.105879	2.64214		Pro-UGG	2739.33	2455.92	1.1154	0.896542	0.157556	-0.157556	0.0637013	0.161461	2597.63	0.085124	1.85426		His-GUG	267.179	208.883	1.27909	0.781808	0.355114	-0.355114	0.0698556	0.164366	238.031	0.197351	1.81285		Leu-UAG	8094.17	6552.87	1.23521	0.80958	0.304755	-0.304755	0.030692	0.0747709	7323.52	0.14103
Arg-ACG	5908.69	4493.96	1.31481	0.760568	0.394851	-0.394851	0.00882245	0.0217966	5201.33	0.150829	2.61886		Ala-UGC	57601.2	62787.3	0.917404	1.09003	-0.124372	0.124372	0.0691978	0.161461	60194.3	0.0684609	-1.81713		Pro-CGG	840.442	996.479	0.843412	1.18566	-0.245691	0.245691	0.0695063	0.164366	918.46	0.135886	-1.81511		Lys-UUU	26663.2	31863.2	0.8368	1.19503	-0.257045	0.257045	0.0310026	0.0747709	29263.2	0.119145
Arg-UCU	2703.53	2275.27	1.18822	0.841594	0.248803	-0.248803	0.0115445	0.0269371	2489.4	0.0983353	2.52577		Thr-CGU	5194.52	5920.28	0.877412	1.13971	-0.188673	0.188673	0.0607926	0.161461	5557.4	0.100614	-1.875		Thr-GGU	15570.2	13486.5	1.1545	0.866178	0.207264	-0.207264	0.0976461	0.206731	14528.4	0.125177	1.65637		Arg-CCG	995.797	815.134	1.22164	0.818574	0.288815	-0.288815	0.0347616	0.0751159	905.466	0.136453
Ser-GGA	19296.3	16756.2	1.15159	0.868363	0.203629	-0.203629	0.0186423	0.0412092	18026.2	0.0865506	2.35261		Gly-CCC	5935.63	5297.36	1.12049	0.892469	0.164127	-0.164127	0.11485	0.245709	5616.5	0.104153	1.57676		Arg-UCU	2915.28	2581.68	1.12922	0.885567	0.175326	-0.175326	0.10337	0.206731	2748.48	0.107528	1.62873		Arg-UCU	2609.27	3088.25	0.844902	1.18357	-0.243144	0.243144	0.0348098	0.0751159	2848.76	0.115045
Thr-CGU	5122.37	4298.89	1.19156	0.839239	0.252847	-0.252847	0.0212097	0.0445404	4710.63	0.10988	2.30423		Leu-GAG	1482.23	1697.48	0.873194	1.14522	-0.195626	0.195626	0.117004	0.245709	1589.86	0.123898	-1.56747		Thr-UGU	19803.4	21688	0.913104	1.09517	-0.131148	0.131148	0.108534	0.206731	20745.7	0.0816925	-1.60482		Trp-CCA	397.866	523.763	0.759629	1.31643	-0.396632	0.396632	0.0427737	0.0876861	460.814	0.195655
Phe-GAA	172.37	128.267	1.34384	0.744137	0.42636	-0.42636	0.0422425	0.0844849	150.319	0.21025	2.03112		Ala-GGC	28518.6	30749.7	0.927444	1.07823	-0.108668	0.108668	0.152535	0.30507	29634.2	0.076008	-1.43063		Asp-GUC	133898	148757	0.900112	1.11097	-0.151823	0.151823	0.10184	0.206731	141327	0.0928074	-1.636		Sec-UCA	66.6466	97.3584	0.684549	1.46082	-0.546774	0.546774	0.100701	0.196606	82.0025	0.330843
Leu-CAG	43485.3	39409.7	1.10342	0.906276	0.141978	-0.141978	0.0667097	0.127355	41447.5	0.0774429	1.83362		Ser-CGA	95.1431	129.996	0.731894	1.36632	-0.450294	0.450294	0.165661	0.316262	112.569	0.327751	-1.38628		Glu-UUC	104283	96878.8	1.07643	0.928998	0.106252	-0.106252	0.123373	0.224315	100581	0.0689536	1.54077		Asp-GUC	119764	133907	0.894381	1.11809	-0.161039	0.161039	0.116138	0.216438	126836	0.102495
Gln-UUG	42846.9	39045.3	1.09736	0.911276	0.13404	-0.13404	0.0899295	0.164219	40946.1	0.079021	1.69577		Gln-CUG	47967.4	44143.4	1.08663	0.920279	0.119856	-0.119856	0.184365	0.320106	46055.4	0.0902669	1.32744		Ser-CGA	101.287	136.692	0.740983	1.34956	-0.432487	0.432487	0.129076	0.22448	118.99	0.288289	-1.51776		Gly-UCC	16704.7	14534.2	1.14934	0.870066	0.200803	-0.200803	0.128726	0.229468	15619.4	0.132154
fMet-CAU	465.672	303.357	1.53506	0.65144	0.618297	-0.618297	0.104277	0.175731	384.515	0.380825	1.62446		Asp-GUC	125937	116759	1.07861	0.927118	0.109176	-0.109176	0.194715	0.320106	121348	0.0841815	1.29676		Val-UAC	41896.4	37813.7	1.10797	0.902551	0.147919	-0.147919	0.168742	0.281237	39855	0.107507	1.37626		Pro-GGG	2524.16	2288.25	1.1031	0.90654	0.141558	-0.141558	0.151803	0.259331	2406.2	0.0985427
Ala-UGC	56805.9	62013.5	0.916025	1.09167	-0.126541	0.126541	0.104602	0.175731	59409.7	0.0779521	-1.62294		His-GUG	251.727	298.685	0.842785	1.18654	-0.246764	0.246764	0.198161	0.320106	275.206	0.190196	-1.28681		Arg-CCU	431.906	491.674	0.878441	1.13838	-0.186983	0.186983	0.183981	0.294369	461.79	0.140241	-1.3286		Pro-UGG	2606.52	2897.67	0.899523	1.1117	-0.152768	0.152768	0.1805	0.29602	2752.09	0.11401
Asp-GUC	124231	135389	0.917583	1.08982	-0.124089	0.124089	0.134817	0.217781	129810	0.0829844	-1.49537		fMet-CAU	471.612	662.102	0.712295	1.40391	-0.489454	0.489454	0.196344	0.320106	566.857	0.378412	-1.29204		Ala-GGC	30309.9	32532.8	0.931674	1.07334	-0.102102	0.102102	0.198381	0.305202	31421.3	0.0793801	-1.28618		Tyr-GUA	89.3935	74.9176	1.19322	0.838065	0.254865	-0.254865	0.370406	0.509046	82.1556	0.286352
Leu-UAG	8380.91	7491.7	1.11869	0.893901	0.161812	-0.161812	0.162095	0.243142	7936.31	0.115836	1.39806		Ile-GAU	7252.81	7918.46	0.915936	1.09178	-0.126681	0.126681	0.239879	0.373145	7585.63	0.107876	-1.17529		Sec-UCA	74.3918	91.0771	0.816801	1.22429	-0.291944	0.291944	0.302958	0.448827	82.7345	0.281994	-1.03011		Met-CAU	8387.01	7719.72	1.08644	0.920437	0.119609	-0.119609	0.369298	0.509046	8053.36	0.133384
Ser-CGA	93.8469	122.547	0.765803	1.30582	-0.384955	0.384955	0.159998	0.243142	108.197	0.277203	-1.40508		Ser-UGA	457.146	505.612	0.904142	1.10602	-0.145378	0.145378	0.258002	0.387003	481.379	0.130528	-1.13113		Gly-UCC	18670.6	17468.7	1.06881	0.935623	0.0960009	-0.0960009	0.377463	0.539233	18069.6	0.108769	0.88258		Ala-UGC	54805.3	52195.9	1.04999	0.952387	0.0703809	-0.0703809	0.372473	0.509046	53500.6	0.0789043
Leu-CAA	210.675	247.323	0.851824	1.17395	-0.231373	0.231373	0.170372	0.246746	228.999	0.169184	-1.37101		Thr-UGU	18640.2	19910.4	0.936205	1.06814	-0.0951032	0.0951032	0.279017	0.404093	19275.3	0.0878914	-1.08253		Ile-GAU	7711.79	8166.37	0.944335	1.05895	-0.0826297	0.0826297	0.45681	0.630083	7939.08	0.111145	-0.74411		Glu-UUC	93306.2	98691.9	0.94543	1.05772	-0.0809582	0.0809582	0.338599	0.509046	95999.1	0.0846048
His-GUG	248.301	210.141	1.18159	0.846314	0.240735	-0.240735	0.198637	0.278092	229.221	0.189859	1.28544		Asn-GUU	68962.4	65147.1	1.05856	0.944675	0.0821094	-0.0821094	0.29041	0.406574	67054.8	0.0776275	1.05722		Ala-UGC	61203.8	63194.3	0.968501	1.03252	-0.0461744	0.0461744	0.511965	0.68262	62199.1	0.0703888	-0.655781		Leu-UAA	51.0928	65.982	0.774345	1.29141	-0.368951	0.368951	0.327299	0.509046	58.5374	0.378338
Pro-UGG	2702.27	2939.43	0.919316	1.08777	-0.121367	0.121367	0.223275	0.302502	2820.85	0.0999401	-1.21787		Thr-GGU	14665	15894	0.922672	1.08381	-0.116111	0.116111	0.341464	0.462629	15279.5	0.122042	-0.951276		Thr-CGU	5517.64	5241.84	1.05262	0.950013	0.0739805	-0.0739805	0.548784	0.68598	5379.74	0.123735	0.599583		Gly-GCC	155263	147585	1.05203	0.950546	0.0731719	-0.0731719	0.438032	0.561229	151424	0.0943401
Sec-UCA	69.066	57.5112	1.20091	0.832698	0.264134	-0.264134	0.407224	0.534482	63.2886	0.318183	0.828789		Gln-UUG	43443.6	41581.2	1.04479	0.95713	0.0632133	-0.0632133	0.393921	0.486608	42512.4	0.0740907	0.852528		Pro-UGG	2910.74	3049.9	0.954373	1.04781	-0.0673742	0.0673742	0.547862	0.68598	2980.32	0.112363	-0.600967		Thr-UGU	17738.3	19231.3	0.922366	1.08417	-0.116589	0.116589	0.435905	0.561229	18484.8	0.149564
Pro-CGG	778.86	828.931	0.939595	1.06429	-0.0898884	0.0898884	0.433381	0.551576	803.896	0.115398	-0.78342		Val-UAC	39458.3	41899.2	0.941742	1.06186	-0.086596	0.086596	0.386321	0.486608	40678.8	0.0999525	-0.866308		Trp-CCA	445.517	474.6	0.938723	1.06528	-0.0912294	0.0912294	0.604456	0.732673	460.058	0.178723	-0.518004		Leu-CAG	41986.1	40070.1	1.04782	0.954366	0.0673859	-0.0673859	0.480576	0.586031	41028.1	0.0955746
Thr-GGU	14472.9	13550.1	1.0681	0.936239	0.0950515	-0.0950515	0.461746	0.561187	14011.5	0.129285	0.735975		Tyr-GUA	93.9854	112.841	0.832904	1.20062	-0.263778	0.263778	0.387688	0.486608	103.413	0.304249	-0.863818		Gly-GCC	173639	169506	1.02438	0.976201	0.0347495	-0.0347495	0.698654	0.821945	171572	0.0897479	0.387139		Ser-GGA	18613.4	17826.1	1.04417	0.957702	0.062351	-0.062351	0.485977	0.586031	18219.8	0.0894205
Val-GAC	5409.91	5736.35	0.943092	1.06034	-0.0845298	0.0845298	0.467655	0.561187	5573.13	0.115991	-0.726299		Leu-UAG	8502.2	8112.31	1.04806	0.954143	0.0677232	-0.0677232	0.574288	0.681349	8307.26	0.120782	0.561748		Leu-CAA	227.037	217.377	1.04444	0.957455	0.0627238	-0.0627238	0.764679	0.873919	222.207	0.207056	0.299342		Leu-CAA	203.393	222.412	0.914488	1.09351	-0.128964	0.128964	0.500367	0.586145	212.903	0.188097
Gln-CUG	47290.8	45329.2	1.04327	0.95852	0.0611194	-0.0611194	0.507836	0.592475	46310	0.0922572	0.662211		Met-CAU	8811.07	8418.55	1.04663	0.955452	0.0657453	-0.0657453	0.584013	0.681349	8614.81	0.12028	0.547532		Ser-GGA	20812.7	21135.7	0.984718	1.01552	-0.0222172	0.0222172	0.804706	0.894118	20974.2	0.0900082	-0.247261		Arg-CCU	386.429	408.739	0.945419	1.05773	-0.0809742	0.0809742	0.604402	0.688347	397.584	0.154126
Ile2-CAU	17.7148	13.2095	1.34107	0.745675	0.423381	-0.423381	0.550065	0.624399	15.4622	0.691924	0.597662		Sec-UCA	70.03	61.5397	1.13796	0.878763	0.186454	-0.186454	0.671144	0.761839	65.7848	0.43546	0.424579		Tyr-GUA	99.8801	96.5468	1.03453	0.966626	0.0489702	-0.0489702	0.849916	0.918828	98.2135	0.249485	0.189226		Ile-GAU	6895.32	7155.84	0.963594	1.03778	-0.0535024	0.0535024	0.628226	0.696143	7025.58	0.110525
Trp-CCA	412.369	388.303	1.06198	0.941639	0.0867537	-0.0867537	0.608515	0.672569	400.336	0.164097	0.512195		Trp-CCA	418.816	402.49	1.04056	0.961018	0.057365	-0.057365	0.729845	0.806671	410.653	0.168481	0.345332		Ser-GCU	19392.4	19535.8	0.99266	1.00739	-0.0106284	0.0106284	0.930909	0.975838	19464.1	0.123008	-0.0867008		Ser-GCU	17326.6	16852.4	1.02813	0.972635	0.0400293	-0.0400293	0.752033	0.811404	17089.5	0.126556
Gly-UCC	17294.4	16891.3	1.02386	0.976692	0.0340248	-0.0340248	0.726422	0.782301	17092.9	0.0973631	0.349889		Arg-ACG	5995.82	6160.28	0.973303	1.02743	-0.0390389	0.0390389	0.801771	0.863445	6078.05	0.154755	-0.251056		Phe-GAA	185.637	186.936	0.993051	1.007	-0.0100609	0.0100609	0.951442	0.975838	186.286	0.201899	-0.060896		Gly-CCC	5643.89	5517.82	1.02285	0.977662	0.0325919	-0.0325919	0.771925	0.811511	5580.86	0.112505
Leu-GAG	1460.77	1429.35	1.02198	0.978489	0.0313718	-0.0313718	0.815297	0.856061	1445.06	0.139489	0.233599		Leu-CAA	213.742	219.61	0.973281	1.02745	-0.0390722	0.0390722	0.841542	0.883619	216.676	0.191546	-0.199921		Pro-GGG	2821.8	2815.6	1.0022	0.997804	0.00317152	-0.00317152	0.978223	0.978223	2818.7	0.113156	0.0272963		Ala-GGC	27126.1	27457	0.987949	1.0122	-0.0174918	0.0174918	0.814423	0.825013	27291.5	0.0746623
Tyr-GUA	92.6343	89.5352	1.03461	0.966545	0.0490916	-0.0490916	0.855394	0.876258	91.0848	0.258998	0.18224		Ile2-CAU	17.98	17.8509	1.00723	0.992821	0.0103941	-0.0103941	0.99286	0.99286	17.9154	1.29006	0.00894935		Leu-UAA	57.0368	53.2817	1.07048	0.934164	0.0982521	-0.0982521	0.786142	NA	55.1592	0.357531	0.271324		Phe-GAA	166.125	174.034	0.954556	1.04761	-0.0670988	0.0670988	0.825013	0.825013	170.08	0.292211
Arg-CCG	1031.15	1042.01	0.989581	1.01053	-0.0151098	0.0151098	0.89106	0.89106	1036.58	0.11127	-0.136962		Pro-CGG	790.332	789.14	1.00151	0.998491	0.00217853	-0.00217853	0.985046	0.99286	789.736	0.121477	0.0187434		Ile2-CAU	19.1198	25.5131	0.749411	1.33438	-0.416172	0.416172	0.475163	NA	22.3165	0.582606	-0.714104		Ile2-CAU	17.0894	15.172	1.12638	0.8878	0.171694	-0.171694	0.81898	NA	16.1307	0.749253
[truncated: 3 more columns]

## Sheet: Statistics_Figure_4_3
Pairwise comparisons of the expression levels of tRNA types in the mature tRNA pool. Using the aligned YAMAT-seq read data as input, DESeq2 output consists of: baseMean1 and baseMean2 (the normalized mean expression level of three replicates of strain 1 and strain 2); fold.change1 and fold.change2 (fold change calculated by baseMean1/baseMean2 or baseMean2/baseMean1, respectively); log2.fold.chan…
Isotypes marked with a * are those directly affected by engineering in one of the comaprison strains
WT_vs_eng_poor
1: MG1655 wild type in poor M9 versus del-glyVXY in poor M9											Higher in wt		2: MG1655 wild type in poor M9 versus del-leuVPQ in poor M9											Higher in wt		3: MG1655 wild type in poor M9 versus del-glyU in poor M9											Higher in wt		4: MG1655 wild type in poor M9 versus del-thrW in poor M9
Result: 3 isotypes more highly expressed in WT; 3 in del-glyVXY											Higher in delglyVXY		Result: 1 isotype (Leu-CAG) more highly expressed in WT; 0 in del-leuVPQ											Higher in delleuVPQ		Result: 2 isotypes more highly expressed in WT; 0 in del-glyU											Higher in delglyU		Result: 2 isotypes more highly expressed in WT; 3 in del-thrW
contig	baseMeanwtpoor	baseMeanglyVXYpoor	Fold.change(WTpoor/glyVXYpoor)	Fold.change(glyVXYpoor/WTpoor)	log2FoldChange1	log2FoldChange2	pvalue	padj	baseMean	lfcSE	stat	notes	contig	baseMeanwtpoor	baseMeanleuVPQpoor	Fold.change(wtpoor/leuVPQ)	Fold.change(leuVPQ/WTpoor)	log2FoldChange1	log2FoldChange2	pvalue	padj	baseMean	lfcSE	stat	notes	contig	baseMeanwtpoor	baseMeanglyUpoor	Fold.change(wtpoor/glyUpoor)	Fold.change(glyUpoor/WTpoor)	log2FoldChange1	log2FoldChange2	pvalue	padj	baseMean	lfcSE	stat	notes	contig	baseMeanwtpoor	baseMeanthrWpoor	Fold.change(wtpoor/thrWpoor)	Fold.change(thrWpoor/WTpoor)	log2FoldChange1	log2FoldChange2	pvalue	padj	baseMean	lfcSE
Gly-GCC*	146787	44993.5	3.26242	0.306521	1.70594	-1.70594	9.86942e-46	3.94777e-44	95890.4	0.120181	14.1948	Higher in wt	Leu-CAG*	35084.8	13724.7	2.55633	0.391186	1.35407	-1.35407	6.7623e-20	2.84017e-18	24404.7	0.148284	9.13139	Higher in wt	Gly-CCC*	5673.08	1.48447	3821.62	0.000261669	11.9	-11.9	1.21856e-74	3.89939e-73	2837.28	0.651893	18.2789	Higher in wt	Thr-CGU*	2961.37	1.69681	1745.25	0.000572983	10.7692	-10.7692	1.31049e-62	5.11092e-61	1481.53	0.65318
Phe-GAA	521.21	329.208	1.58322	0.631624	0.662863	-0.662863	0.000103338	0.00206676	425.209	0.170378	3.88262	Higher in wt	Gly-CCC	5478.58	6417.99	0.853629	1.17147	-0.228318	0.228318	0.0199386	0.418711	5948.28	0.097932	-2.3275		Trp-CCA	1275.48	917.569	1.39007	0.719389	0.475156	-0.475156	3.2777e-05	0.000524432	1096.53	0.114256	4.15326	Higher in wt	Lys-UUU	29438.5	36442.2	0.807812	1.23791	-0.307909	0.307909	0.000164357	0.00320496	32940.3	0.0816928
Ile-GAU	7383.89	5532.94	1.33453	0.749325	0.416337	-0.416337	0.000419695	0.00559593	6458.41	0.118135	3.52738	Higher in wt	Ser-UGA	676.993	539.121	1.25573	0.796347	0.328531	-0.328531	0.0834883	0.771088	608.057	0.189829	1.7308		Cys-GCA	9343.47	12713	0.734955	1.36063	-0.444272	0.444272	0.00305115	0.0325456	11028.2	0.149907	-2.96254		Glu-UUC	119157	104508	1.14017	0.877063	0.189248	-0.189248	0.000512074	0.00665696	111833	0.0544717
Gly-CCC	5297.09	6413.95	0.82587	1.21084	-0.276014	0.276014	0.00117031	0.00789076	5855.52	0.0850204	-3.24602	Higher in delglyVXY	Arg-UCU	3432.18	3946.55	0.869667	1.14987	-0.201465	0.201465	0.0917962	0.771088	3689.37	0.118976	-1.686		Lys-UUU	30115.7	39882.3	0.755113	1.3243	-0.405235	0.405235	0.00412203	0.0329762	34999	0.141262	-2.86867		Cys-GCA	9128.35	12662.1	0.720918	1.38712	-0.472093	0.472093	0.000799902	0.00779905	10895.2	0.140761
Pro-GGG	2106.75	2580.6	0.816382	1.22492	-0.292684	0.292684	0.00111695	0.00789076	2343.68	0.08999	-3.25928	Higher in delglyVXY	Gly-UCC	15390.6	17779.2	0.865652	1.1552	-0.208141	0.208141	0.0854931	0.771088	16584.9	0.120964	-1.71967		Thr-UGU	17463.9	22524.9	0.775315	1.2898	-0.367146	0.367146	0.00727336	0.0465495	19994.4	0.136783	-2.68406		Ser-CGA	288.996	384.687	0.75125	1.33111	-0.412635	0.412635	0.00115709	0.0090253	336.842	0.128086
Leu-UAA	347.288	520.304	0.66747	1.49819	-0.583225	0.583225	0.00118361	0.00789076	433.796	0.180475	-3.2428	Higher in delglyVXY	Phe-GAA	539.489	445.098	1.21207	0.825035	0.277473	-0.277473	0.192284	0.99584	492.293	0.210268	1.30385		Arg-ACG	6869.93	5054.04	1.35929	0.735676	0.442857	-0.442857	0.0097601	0.0520539	5961.99	0.171276	2.58421		Leu-GAG	973.58	551.02	1.76687	0.565973	0.821194	-0.821194	0.00193212	0.0125588	762.3	0.264997
Ala-GGC	20662.9	27243.7	0.758446	1.31849	-0.398882	0.398882	0.0040352	0.0230583	23953.3	0.138733	-2.8754		Ile2-CAU	1.3967	1.18456	1.17909	0.848114	0.237671	-0.237671	0.952162	0.99584	1.29063	3.86916	0.0599924		Arg-CCG	874.007	640.463	1.36465	0.732789	0.448531	-0.448531	0.0155665	0.071161	757.235	0.186542	2.41892		Gly-GCC	153680	131426	1.16933	0.855194	0.225676	-0.225676	0.0102361	0.0570298	142553	0.0878961
Pro-CGG	607.424	473.875	1.28182	0.780138	0.358198	-0.358198	0.00722443	0.0361221	540.649	0.134406	2.68632		Leu-UAA	359.657	314.932	1.14202	0.875644	0.191584	-0.191584	0.438599	0.99584	337.295	0.243575	0.774561		Glu-UUC	121875	100277	1.21539	0.822782	0.281417	-0.281417	0.018353	0.0734119	111076	0.119331	2.35842		Thr-UGU	17077.1	20026.2	0.852737	1.17269	-0.229827	0.229827	0.0210875	0.102802	18551.6	0.0996035
Arg-CCU	174.727	255.724	0.683264	1.46356	-0.549486	0.549486	0.0155487	0.0691053	215.226	0.226389	-2.41934		Trp-CCA	1231.25	1104.2	1.11505	0.896818	0.157113	-0.157113	0.203787	0.99584	1167.72	0.124356	1.27084		Gly-GCC	157231	128706	1.22163	0.81858	0.288805	-0.288805	0.0247473	0.0879905	142968	0.128633	2.24532		Arg-ACG	6732.57	4811.66	1.39922	0.714685	0.484621	-0.484621	0.0407717	0.176677	5772.11	0.236829
Ser-UGA	655.726	504.713	1.29921	0.7697	0.377631	-0.377631	0.0592569	0.237028	580.219	0.198826	1.88628		Tyr-GUA	114.899	104.004	1.10476	0.905172	0.143736	-0.143736	0.760737	0.99584	109.451	0.465652	0.304513		Thr-CGU	3026.46	3489.03	0.867424	1.15284	-0.205191	0.205191	0.0277917	0.0889336	3257.75	0.093197	-2.20021		Pro-GGG	2205.33	2027.64	1.08763	0.919426	0.121194	-0.121194	0.062405	0.243379	2116.48	0.0652493
Leu-CAA	442.368	353.402	1.25174	0.798888	0.323936	-0.323936	0.0846013	0.296913	397.885	0.186562	1.72459		Thr-GGU	12931.6	11797.3	1.09615	0.91228	0.132451	-0.132451	0.618715	0.99584	12364.5	0.266003	0.497673		Leu-GAG	993.12	651.774	1.52372	0.656289	0.607596	-0.607596	0.0689993	0.190448	822.447	0.334322	1.81842		Pro-UGG	2590.73	2772.99	0.934273	1.07035	-0.0980844	0.0980844	0.0772674	0.273948	2681.86	0.0548574
Trp-CCA	1191.24	991.1	1.20193	0.831992	0.265358	-0.265358	0.0890739	0.296913	1091.17	0.15517	1.7003		Leu-CAA	457.209	418.395	1.09277	0.915106	0.127989	-0.127989	0.497516	0.99584	437.802	0.187934	0.678403		Ser-GCU	25259.1	20553.4	1.22895	0.813703	0.297426	-0.297426	0.0714181	0.190448	22906.3	0.165016	1.80281		Leu-UAG	4902.35	4126.13	1.18812	0.841665	0.248681	-0.248681	0.0904956	0.287836	4514.24	0.146813
Ser-GGA	16637.6	14483.2	1.14875	0.870508	0.20007	-0.20007	0.133484	0.410721	15560.4	0.133241	1.5005		Gln-CUG	29089.2	26995.2	1.07757	0.928013	0.107783	-0.107783	0.492026	0.99584	28042.2	0.156933	0.68709		Val-GAC	5438.69	4703.65	1.15627	0.864849	0.20948	-0.20948	0.124938	0.2933	5071.17	0.136588	1.53437		Gln-UUG	31262.2	36865.5	0.848006	1.17924	-0.237854	0.237854	0.0959455	0.287836	34063.8	0.142867
Cys-GCA	8717.79	9825.41	0.88727	1.12705	-0.172555	0.172555	0.220246	0.587324	9271.6	0.140658	-1.22587		Val-GAC	5265.99	4912.7	1.07191	0.932911	0.100189	-0.100189	0.472978	0.99584	5089.35	0.13921	0.717642		Leu-UAG	5006.71	4408.03	1.13582	0.880425	0.183728	-0.183728	0.128319	0.2933	4707.37	0.120733	1.52077		Leu-CAA	462.945	549.104	0.84309	1.18611	-0.246241	0.246241	0.105769	0.294643	506.025	0.153701
Val-UAC	51383.4	60017.6	0.856138	1.16804	-0.224085	0.224085	0.20727	0.587324	55700.5	0.17769	-1.26111		Thr-CGU	2926	2752.37	1.06308	0.940659	0.0882563	-0.0882563	0.401187	0.99584	2839.18	0.10442	0.839504		Gly-UCC	15947.6	13869.5	1.14983	0.869694	0.20142	-0.20142	0.141835	0.302581	14908.5	0.137205	1.46899		Leu-UAA	363.756	280.923	1.29486	0.772285	0.372795	-0.372795	0.126062	0.327762	322.34	0.24243
Tyr-GUA	111.015	87.0818	1.27483	0.784418	0.350306	-0.350306	0.309994	0.606247	99.0481	0.340434	1.01523		Ile-GAU	7638.59	7191.58	1.06216	0.941481	0.0869961	-0.0869961	0.327683	0.99584	7415.08	0.0888844	0.978792		Gln-UUG	31998.9	36096.4	0.886485	1.12805	-0.173831	0.173831	0.256807	0.513614	34047.7	0.153283	-1.13397		Arg-CCG	854.596	742.943	1.15029	0.86935	0.201991	-0.201991	0.170604	0.39704	798.77	0.149177
Gln-CUG	28157.4	25070.6	1.12312	0.890374	0.167517	-0.167517	0.333436	0.606247	26614	0.173203	0.967217		Pro-CGG	628.14	592.717	1.05976	0.943607	0.0837416	-0.0837416	0.632772	0.99584	610.428	0.179534	0.477829		Ser-GGA	17807.3	16354	1.08886	0.918388	0.122825	-0.122825	0.320445	0.59247	17080.6	0.123622	0.993544		Gly-CCC	5547.25	5267.7	1.05307	0.949606	0.0745993	-0.0745993	0.173069	0.39704	5407.48	0.0553983
Ser-GCU	23591.1	21286.9	1.10825	0.902327	0.148278	-0.148278	0.323206	0.606247	22439	0.150101	0.987891		Leu-GAG	963.137	924.151	1.04219	0.959522	0.0596121	-0.0596121	0.862676	0.99584	943.644	0.340877	0.172969		Pro-GGG	2254.75	2103.28	1.07202	0.932822	0.100326	-0.100326	0.333264	0.59247	2179.02	0.10461	0.96756		Thr-GGU	13075.7	11219.8	1.16541	0.858064	0.220842	-0.220842	0.271138	0.556547	12147.7	0.20063
Met-CAU	5296.58	5774.5	0.917236	1.09023	-0.124635	0.124635	0.268657	0.606247	5535.54	0.112323	-1.10616		Asn-GUU	72940	71087.4	1.02606	0.974602	0.0371154	-0.0371154	0.813028	0.99584	72013.7	0.157014	0.236521		Arg-UCU	3557.27	3328.3	1.06879	0.935635	0.095982	-0.095982	0.396617	0.667987	3442.79	0.114383	0.847678		Gln-CUG	29466.5	33809.9	0.871535	1.1474	-0.19837	0.19837	0.26223	0.556547	31638.2	0.176922
Gly-UCC	14885.3	16309.9	0.912655	1.0957	-0.131859	0.131859	0.3012	0.606247	15597.6	0.127564	-1.03386		Ser-GCU	24375.5	23957.8	1.01743	0.982864	0.0249363	-0.0249363	0.883384	0.99584	24166.6	0.170303	0.146681		Val-UAC	54954.4	59883.9	0.917682	1.0897	-0.123933	0.123933	0.425421	0.680674	57419.1	0.155501	-0.797052		Val-GAC	5326.66	3444.32	1.54651	0.646619	0.629012	-0.629012	0.288959	0.563471	4385.49	0.593271
Asn-GUU	70604.4	79436.9	0.88881	1.1251	-0.170053	0.170053	0.290659	0.606247	75020.7	0.160929	-1.05668		Arg-ACG	6658.49	6664.85	0.999046	1.00095	-0.00137696	0.00137696	0.99584	0.99584	6661.67	0.284793	-0.00521335		Pro-UGG	2649.72	2531.21	1.04682	0.955274	0.0660141	-0.0660141	0.469422	0.682795	2590.46	0.0927021	0.723421		fMet-CAU	218.701	147.421	1.48351	0.674076	0.569018	-0.569018	0.330054	0.5909	183.061	0.583103
Ser-CGA	276.26	329.586	0.838204	1.19303	-0.254626	0.254626	0.279376	0.606247	302.923	0.238997	-1.08172		Thr-UGU	16864.2	16898.8	0.997952	1.00205	-0.00295767	0.00295767	0.978718	0.99584	16881.5	0.110296	-0.0266758		Ala-UGC	54202.7	58085.8	0.933148	1.07164	-0.0998226	0.0998226	0.460032	0.682795	56144.2	0.135133	-0.738795		Ser-GGA	17409.8	16335	1.06579	0.938268	0.0919277	-0.0919277	0.333328	0.5909	16872.4	0.0948829
Gln-UUG	29872.2	27012	1.10589	0.904253	0.145202	-0.145202	0.371634	0.619389	28442.1	0.162509	0.893418		Gln-UUG	30864.1	30930.1	0.997865	1.00214	-0.00308332	0.00308332	0.983621	0.99584	30897.1	0.148474	-0.02053		Pro-CGG	650.437	604.297	1.07635	0.929064	0.10615	-0.10615	0.54217	0.754323	627.367	0.177829	0.609536		Ser-GCU	24683.4	22321.3	1.10582	0.904305	0.145118	-0.145118	0.375821	0.637262	23502.3	0.163894
His-GUG	165.069	199.541	0.827245	1.20883	-0.273614	0.273614	0.357712	0.619389	182.305	0.298376	-0.919733		Val-UAC	53215.9	53340.8	0.99766	1.00235	-0.00338017	0.00338017	0.983611	0.99584	53278.3	0.165747	-0.0205416		Ser-UGA	701.451	657.388	1.06703	0.937183	0.093597	-0.093597	0.683441	0.859396	679.419	0.221586	0.407773		Leu-CAG	35490.9	32028.9	1.10809	0.902453	0.148077	-0.148077	0.403356	0.655453	33759.9	0.177214
Thr-UGU	16302.7	15278.1	1.06707	0.937149	0.09365	-0.09365	0.423645	0.651761	15790.4	0.1172	0.800114		Ala-GGC	21381.6	21596.2	0.990059	1.01004	-0.0144129	0.0144129	0.912894	0.99584	21488.9	0.132514	-0.109389		Leu-CAG	36245.3	34636.1	1.04646	0.955604	0.065515	-0.065515	0.698259	0.859396	35440.7	0.169075	0.387671		Ala-GGC	21632.2	20481.2	1.0562	0.946792	0.0788798	-0.0788798	0.476907	0.743975	21056.7	0.1108
Glu-UUC	113826	107307	1.06075	0.942727	0.0850874	-0.0850874	0.411861	0.651761	110567	0.103667	0.820623		Gly-GCC	151748	154209	0.984039	1.01622	-0.0232127	0.0232127	0.818088	0.99584	152978	0.100851	-0.230005		Gln-CUG	30164.6	31536	0.956511	1.04547	-0.0641459	0.0641459	0.687495	0.859396	30850.3	0.159385	-0.402256		Ala-UGC	53063.4	50361.1	1.05366	0.949074	0.0754074	-0.0754074	0.582429	0.864314	51712.3	0.137096
Lys-UUU	28110.5	26077.4	1.07797	0.927674	0.108311	-0.108311	0.455064	0.674169	27094	0.145075	0.746999		Pro-UGG	2558.56	2610.35	0.980157	1.02024	-0.0289148	0.0289148	0.756572	0.99584	2584.45	0.0909818	-0.309986		Ile-GAU	7905.25	7748.34	1.02025	0.980151	0.0289242	-0.0289242	0.800942	0.883798	7826.79	0.114167	0.252129		Gly-UCC	15587.7	15060	1.03504	0.966143	0.049692	-0.049692	0.599421	0.864314	15323.9	0.0948699
Arg-ACG	6425.28	5654.16	1.13638	0.879986	0.184447	-0.184447	0.623693	0.755991	6039.72	0.375969	0.490624		fMet-CAU	216.805	222.305	0.975257	1.02537	-0.0361454	0.0361454	0.958628	0.99584	219.555	0.720274	-0.0518753		Met-CAU	5674.41	5810.97	0.9765	1.02407	-0.0343086	0.0343086	0.751603	0.883798	5742.69	0.107808	-0.316527		Pro-CGG	635.982	671.131	0.947627	1.05527	-0.0776093	0.0776093	0.620533	0.864314	653.556	0.15226
Arg-UCU	3319.38	3165.49	1.04862	0.953639	0.0684854	-0.0684854	0.531465	0.755991	3242.44	0.109794	0.625771		Asp-GUC	127786	131769	0.969777	1.03116	-0.0442744	0.0442744	0.717891	0.99584	129777	0.122519	-0.361279		Ala-GGC	22102.4	22661.2	0.975341	1.02528	-0.036021	0.036021	0.77693	0.883798	22381.8	0.127234	-0.283322		Arg-UCU	3476.67	3600.12	0.96571	1.03551	-0.0503383	0.0503383	0.672107	0.903868	3538.39	0.117191
Asp-GUC	123671	118403	1.04449	0.957401	0.062804	-0.062804	0.606275	0.755991	121037	0.121846	0.515398		Ala-UGC	52458	54225.1	0.967413	1.03369	-0.0477969	0.0477969	0.744344	0.99584	53341.5	0.146669	-0.326107		Asn-GUU	75661.6	74267.8	1.01877	0.981579	0.0268235	-0.0268235	0.863416	0.891268	74964.7	0.156013	0.172027		His-GUG	172.802	159.176	1.08561	0.921145	0.1185	-0.1185	0.705942	0.917725	165.989	0.305519
Pro-UGG	2474.04	2554.31	0.968577	1.03244	-0.0460613	0.0460613	0.614026	0.755991	2514.17	0.0919924	-0.504336		Ser-GGA	17197.9	17995.1	0.955701	1.04635	-0.0653692	0.0653692	0.592938	0.99584	17596.5	0.122264	-0.534584		Thr-GGU	13345.1	13647.1	0.977874	1.02263	-0.0322802	0.0322802	0.848934	0.891268	13496.1	0.16984	-0.190478		Val-UAC	53824.1	33965.4	1.58467	0.631045	0.664186	-0.664186	0.787654	0.969922	43894.7	2.46589
Thr-CGU	2827.41	2964	0.953917	1.04831	-0.0680641	0.0680641	0.610189	0.755991	2895.7	0.132024	-0.509804		Pro-GGG	2178.83	2282.8	0.954455	1.04772	-0.0672511	0.0672511	0.509007	0.99584	2230.81	0.101629	-0.660385		Asp-GUC	132448	133068	0.995341	1.00468	-0.00673717	0.00673717	0.960583	0.960583	132758	0.13611	-0.0494222		Arg-CCU	182.955	179.248	1.02068	0.979736	0.029535	-0.029535	0.827514	0.969922	181.102	0.144526
Leu-UAG	4681.03	4927.68	0.949945	1.05269	-0.0740837	0.0740837	0.620539	0.755991	4804.36	0.149913	-0.495087		Glu-UUC	117690	123636	0.951907	1.05052	-0.0711071	0.0711071	0.50439	0.99584	120663	0.106493	-0.667598		Leu-UAA	371.395	294.011	1.2632	0.791639	0.337086	-0.337086	0.294111	NA	332.703	0.318678	1.04915		Asp-GUC	129417	131434	0.984655	1.01558	-0.0223103	0.0223103	0.845573	0.969922	130426	0.114526
Arg-CCG	816.132	787.973	1.03574	0.965497	0.0506563	-0.0506563	0.655965	0.768911	802.052	0.116073	0.445491		Met-CAU	5479.67	5808.17	0.943441	1.05995	-0.0839952	0.0839952	0.405405	0.99584	5643.92	0.10076	-0.832008		Phe-GAA	557.353	474.596	1.17437	0.851519	0.23189	-0.23189	0.369867	NA	515.974	0.254939	0.896722		Asn-GUU	73899.5	75911.7	0.973493	1.02723	-0.0387582	0.0387582	0.810052	0.969922	74905.6	0.161217
Leu-GAG	929.24	1034.34	0.898387	1.11311	-0.154592	0.154592	0.672797	0.768911	981.792	0.365833	-0.422312		Ser-CGA	285.461	305	0.93594	1.06844	-0.0955121	0.0955121	0.690751	0.99584	295.23	0.237903	-0.397836		Tyr-GUA	118.704	103.793	1.14367	0.874379	0.193669	-0.193669	0.856909	NA	111.248	1.07287	0.18031		Trp-CCA	1246.71	1230.71	1.013	0.987166	0.0186359	-0.0186359	0.879062	0.97612	1238.71	0.115575
Val-GAC	5084.26	4886.55	1.04046	0.961114	0.0572212	-0.0572212	0.721895	0.802106	4985.4	0.161402	0.355927		Arg-CCG	844.029	903.487	0.934191	1.07044	-0.0982101	0.0982101	0.507571	0.99584	873.758	0.145236	-0.662624		fMet-CAU	222.361	203.988	1.09007	0.917373	0.12442	-0.12442	0.837562	NA	213.174	0.601451	0.205013		Ser-UGA	685.328	698.073	0.981742	1.0186	-0.0265838	0.0265838	0.901034	0.97612	691.701	0.228738
Leu-CAG	33884.5	34889.2	0.971204	1.02965	-0.0421541	0.0421541	0.821082	0.871399	34386.9	0.186364	-0.226153		Arg-CCU	180.768	194.074	0.931438	1.07361	-0.102469	0.102469	0.728256	0.99584	187.421	0.294794	-0.347446		Leu-CAA	473.633	490.409	0.965792	1.03542	-0.050216	0.050216	0.824189	NA	482.021	0.238976	-0.22216		Phe-GAA	545.686	537.546	1.01514	0.985083	0.0216823	-0.0216823	0.942086	0.985932	541.616	0.272446
fMet-CAU	208.589	236.248	0.882922	1.1326	-0.179643	0.179643	0.827829	0.871399	222.418	0.826916	-0.217487		Cys-GCA	9010.12	9697.95	0.929075	1.07634	-0.106133	0.106133	0.401613	0.99584	9354.03	0.126224	-0.838745		His-GUG	176.275	192.609	0.915196	1.09266	-0.127848	0.127848	0.822156	NA	184.442	0.572778	-0.224773		Met-CAU	5548.98	5534.85	1.00255	0.997454	0.00367751	-0.00367751	0.96144	0.985932	5541.92	0.0895158
Thr-GGU	12482.9	12717	0.981587	1.01876	-0.0268125	0.0268125	0.882508	0.905136	12600	0.181529	-0.147791		Leu-UAG	4846.38	5320.85	0.910829	1.0979	-0.134748	0.134748	0.293683	0.99584	5083.61	0.12871	-1.05008		Ile2-CAU	1.45901	1.6025	0.910459	1.09835	-0.135334	0.135334	0.970587	NA	1.53075	3.84679	-0.0368726		Ile-GAU	7732.42	7724.08	1.00108	0.99892	0.0015587	-0.0015587	0.985932	0.985932	7728.25	0.0695223
Ala-UGC	50684.6	50728.3	0.999137	1.00086	-0.00124491	0.00124491	0.993373	0.993373	50706.4	0.151527	-0.00830554		Sec-UCA	73.9688	82.1352	0.900574	1.1104	-0.151083	0.151083	0.801868	0.99584	78.052	0.602088	-0.25093		Sec-UCA	76.4951	92.9237	0.823203	1.21477	-0.280679	0.280679	0.852881	NA	84.7094	1.51486	-0.185444		Tyr-GUA	116.217	104.269	1.11458	0.897197	0.156503	-0.156503	0.560105	NA	110.243	0.255489
Sec-UCA	71.524	72.4879	0.986702	1.01348	-0.0193133	0.0193133	0.952139	NA	72.006	0.413884	-0.0600203		Lys-UUU	29067.2	33019.4	0.880307	1.13597	-0.183922	0.183922	0.17035	0.99584	31043.3	0.134132	-1.37108		Arg-CCU	187.009	234.226	0.79841	1.25249	-0.324799	0.324799	0.474778	NA	210.617	0.454895	-0.714727		Sec-UCA	74.8401	92.7114	0.807237	1.23879	-0.308936	0.308936	0.202652	NA	83.7758	0.248633
Ile2-CAU	1.35841	2.41635	0.562173	1.77881	-0.830913	0.830913	0.794019	NA	1.88738	3.18558	-0.261095		His-GUG	171.004	195.092	0.876527	1.14087	-0.190129	0.190129	0.586	0.99584	183.048	0.355604	-0.544641		Ser-CGA	295.67	384.657	0.768658	1.30097	-0.379586	0.379586	0.155544	NA	340.164	0.267539	-1.42022		Ile2-CAU	1.4185	2.98181	0.475717	2.10209	-1.07183	1.07183	0.394833	NA	2.20015	1.26645
[truncated: 3 more columns]

## Sheet: Statistics_Figure_5
Fig 5 Relative ER
ANOVA with Dunnet’s correction for multiple comparisons
	LB		GA 0.8		Glycerol
Dunnett's multiple comparisons test	Mean Diff.	Adjusted P Value	Mean Diff.	Adjusted P Value	Mean Diff.	Adjusted P Value
MG1655 vs. ΔasnT (GTT)	0.07692	0.0073	0.08678	0.3304	-0.1964	0.0412
MG1655 vs. ΔserX (GGA)	0.07692	0.0073	0.01724	0.9979	0	>0.9999
MG1655 vs. ΔglyU (CCC)	0.1692	<0.0001	-0.09914	0.2276	-0.12	0.2671
MG1655 vs. ΔleuX (CAA)	0.07692	0.0073	-0.03448	0.9426	-0.4737	0.0002
MG1655 vs. ΔleuVPQ (CAG)	0.464	<0.0001	0.335	0.0001	-0.2727	0.007
MG1655 vs. ΔglyVXY (GCC)	0.1944	<0.0001	0.3993	<0.0001	-0.3732	0.0009

## Sheet: Statistics_Figure_6
Figure 6A	ME-tRNA co-deletions vs tRNA deletions								ME-tRNA co-deletions vs ME deletions						ME deletions vs WT
Medium	ΔthrW cmoB vs ΔthrW (CGU)	ΔproK cmoB vs ΔproK (CGG)	ΔserU cmoB vs. ΔserU (CGA)	ΔleuVPQ cmoB vs. ΔleuVPQ (CAG)	ΔglyU mnmG vs. ΔglyU (CCC)	ΔasnU tgt vs ΔasnU (GUU)		Medium	Comparisions			Adjusted P Value			Medium	WT vs ΔcmoA	WT vs ΔcmoB	WT vs ΔmnmG	WT vs Δtgt
TB	0.0009	0.3849	0.079	0.0067	0.0049	0.1098		TB	ΔcmoB vs. ΔproK cmoB			0.4265			TB	0.0523	0.0166	0.0361	0.247
LB	0.0082	0.0033	0.0457	0.4265	0.0077	0.0014			ΔcmoB vs. ΔthrW cmoB			0.2233			LB	0.0067	0.0024	0.0002	0.0126
Gal	0.1693	0.0452	0.0929	0.9729	0.0135	0.2916			ΔcmoB vs. ΔserU cmoB			0.8379			Gal	0.0499	0.2253	0.0197	0.032
Glyc	0.0025	0.0913	0.0179	0.0634	0.001	0.0298			ΔcmoB vs. ΔleuVPQ cmoB			>0.9999			Glyc	0.0041	0.006	0.0247	0.0026
P values between the pair of strains mentioned in the column header (t-test)									ΔmnmG vs. ΔglyU mnmG			0.0946			P values between the pair of strains mentioned in the column header (t-test)
									Δtgt vs. ΔasnU tgt			0.0254
								LB	ΔcmoB vs. ΔproK cmoB			>0.9999
									ΔcmoB vs. ΔthrW cmoB			0.292
									ΔcmoB vs. ΔserU cmoB			>0.9999
									ΔcmoB vs. ΔleuVPQ cmoB			0.0239
									ΔmnmG vs. ΔglyU mnmG			0.1983
									Δtgt vs. ΔasnU tgt			0.0106
								Gal	ΔcmoB vs. ΔproK cmoB			0.2558
									ΔcmoB vs. ΔthrW cmoB			>0.9999
									ΔcmoB vs. ΔserU cmoB			>0.9999
									ΔcmoB vs. ΔleuVPQ cmoB			0.0791
									ΔmnmG vs. ΔglyU mnmG			0.0084
									Δtgt vs. ΔasnU tgt			0.033
								Glyc	ΔcmoB vs. ΔproK cmoB			0.1258
									ΔcmoB vs. ΔthrW cmoB			>0.9999
									ΔcmoB vs. ΔserU cmoB			0.928
									ΔcmoB vs. ΔleuVPQ cmoB			0.0075
									ΔmnmG vs. ΔglyU mnmG			0.4724
									Δtgt vs. ΔasnU tgt			0.0073
								P value adjusted for multiple comparisons using Dunett's test (in case of co-deletion with cmoB) and P values from …........
Figure 6B	TB			LB			Gal			Glyc
	Mean Diff.	Summary	Adjusted P Value	Mean Diff.	Summary	Adjusted P Value	Mean Diff.	Summary	Adjusted P Value	Mean Diff.	Summary	Adjusted P Value
Δrrn4 vs. Δrrn1	-0.201	****	<0.0001	-0.1623	****	<0.0001	0.563	****	<0.0001	1.21	****	<0.0001
Δrrn4 vs. Δrrn2	-0.1772	****	<0.0001	-0.1959	****	<0.0001	0.2833	****	<0.0001	0.487	****	<0.0001
Δrrn4 vs. Δrrn3	-0.159	****	<0.0001	-0.1732	****	<0.0001	0.1345	**	0.0012	0.1723	ns	0.1262
Δrrn4 vs. Δrrn4'	0.03948	ns	0.8116	0.07551	*	0.0144	-0.03557	ns	0.9513	-0.08434	ns	0.8959
Δrrn4 vs. ΔasnU (GUU)	-0.3237	****	<0.0001	-0.1834	****	<0.0001	0.5536	****	<0.0001	1.338	****	<0.0001
Δrrn4 vs. ΔasnU ΔrRNA4	-0.03648	ns	0.8764	-0.00786	ns	0.9995	0.1155	**	0.0075	0.1579	ns	0.1978
Δrrn4 vs. ΔasnV (GUU)	-0.1263	***	0.0005	-0.1602	****	<0.0001	0.5461	****	<0.0001	1.396	****	<0.0001
Δrrn4 vs. ΔasnV ΔrRNA4	0.03168	ns	0.9508	0.01866	ns	0.9912	0.04889	ns	0.7104	0.07188	ns	0.9657
Δrrn4 vs. ΔtyrV (GUA)	-0.247	****	<0.0001	-0.04323	ns	0.4055	0.5323	****	<0.0001	1.206	****	<0.0001
Δrrn4 vs. ΔtyrV ΔrRNA4	0.005227	ns	0.9997	0.01394	ns	0.9991	0.09598	*	0.0419	0.3094	***	0.0004
Δrrn4 vs. ΔleuX (CAA)	-0.1147	**	0.002	-0.09633	***	0.0008	0.6112	****	<0.0001	1.746	****	<0.0001
Δrrn4 vs. ΔleuX ΔrRNA4	0.005177	ns	0.9997	0.06245	ns	0.0689	-0.06654	ns	0.3199	-0.004439	ns	>0.9999
Δrrn4 vs. ΔglyVXY (GCC)	0.1069	**	0.0048	0.08677	**	0.0031	0.3619	****	<0.0001	0.8055	****	<0.0001
Δrrn4 vs. ΔglyVXY rRNA4	0.3457	****	<0.0001	0.3153	****	<0.0001	0.6032	****	<0.0001	1.069	****	<0.0001
Δrrn4 vs. ΔleuVPQ (CAG)	-0.02009	ns	0.9989	0.1568	****	<0.0001	0.4528	****	<0.0001	0.8372	****	<0.0001
Δrrn4 vs. ΔleuVPQ ΔrRNA4	-0.004576	ns	0.9998	-0.00574	ns	0.9997	0.01945	ns	0.9991	-0.0383	ns	0.9991
P value adjusted for multiple comparisons using Dunett's test
Mean differences between each mutant and rrn4 mutant
